# Supplementary material for: The quasi-irreversible inactivation of cytochrome P450 enzymes by paroxetine: a computational approach
Source: Royal Society of Chemistry journal article supplement (doi:10.1039/d0ob00529k), 2020-01-01
Supplement: d0ob00529k1.pdf [file d0ob00529k1.pdf]

### *Supporting Information*

#### **The quasi-irreversible inactivation of Cytochrome P450 enzymes by paroxetine: A computational approach**

**Emadeldin M. Kamel<sup>\*a,b</sup> and Al Mokhtar Lamsabhi<sup>b, c</sup>**

<sup>a</sup>Chemistry Department, Faculty of Science, Beni-Suef University, Beni-Suef, 62514, Egypt.

<sup>b</sup>Departamento de Química, Universidad Autónoma de Madrid, Módulo 13, Campus de Excelencia UAM-CSIC Cantoblanco, Madrid, Spain.

<sup>c</sup>Institute for Advanced Research in Chemical Sciences (IAdChem), Universidad Autónoma de Madrid, 28049 Madrid, Spain.

\*E-mail: [emad.abdelhameed@science.bsu.edu.eg](mailto:emad.abdelhameed@science.bsu.edu.eg)

#### **Table of Contents**

|                                                                                                                                                                                                 |    |
|-------------------------------------------------------------------------------------------------------------------------------------------------------------------------------------------------|----|
| Table S1. Relative energy (RE) (in kcal/mol) and atomic energy (in a.u.) at the B3LYP level of theory for the methylenedioxy hydroxylation of paroxetine by P450 (Cpd I).....                   | S2 |
| Table S2. Relative energy (RE) (in kcal/mol) and atomic energy (in a.u.) at the B3LYP level of theory for the secondary amine hydroxylation of paroxetine by P450 (Cpd I) by HAT mechanism..... | S2 |
| Table S3. Relative energy (RE) (in kcal/mol) and atomic energy (in a.u.) at the B3LYP level of theory for the secondary amine hydroxylation of paroxetine by P450 (Cpd I) by OAR mechanism..... | S3 |
| Table S4. Relative energy (RE) (in kcal/mol) and atomic energy (in a.u.) at the B3LYP level of theory for the dehydration of hydroxylated paroxetine and coordination to the heme iron.....     | S3 |
| Cartesian coordinates of all structures represented in this study.....                                                                                                                          | S4 |

**Table S1. Relative energy (RE) (in kcal/mol) and atomic energy (in a.u.) at the B3LYP level of theory for the methylenedioxy hydroxylation of paroxetine by P450 (Cpd I).**

|                                  | UB3LYP/BS1   |        | UB3LYP/BS1+ZPE |        | UB3LYP/BS2//BS1 |        | UB3LYP/BS2//BS1+ZPE |        | UB3LYP/BS2//BS1+Bulk Polarity |        | UB3LYP/BS2//BS1+ZPE+ Bulk Polarity |        |
|----------------------------------|--------------|--------|----------------|--------|-----------------|--------|---------------------|--------|-------------------------------|--------|------------------------------------|--------|
|                                  | AE           | RE     | AE             | RE     | AE              | RE     | AE                  | RE     | AE                            | RE     | AE                                 | RE     |
| <sup>2</sup> RC <sub>m</sub>     | -2702.053927 | 0.00   | -2701.402891   | 0.00   | -2702.695408    | 0.00   | -2702.044372        | 0.00   | -2702.714922                  | 0.00   | -2702.063886                       | 0.00   |
| <sup>4</sup> RC <sub>m</sub>     | -2702.053878 | 0.03   | -2701.402811   | 0.05   | -2702.695258    | 0.09   | -2702.044191        | 0.11   | -2702.714820                  | 0.06   | -2702.063753                       | 0.08   |
| <sup>2</sup> TS-H <sub>m</sub>   | -2702.031204 | 14.26  | -2701.386160   | 10.50  | -2702.676048    | 12.15  | -2702.031004        | 8.39   | -2702.700337                  | 9.15   | -2702.055293                       | 5.39   |
| <sup>4</sup> TS-H <sub>m</sub>   | -2702.031459 | 14.10  | -2701.385734   | 10.77  | -2702.678572    | 10.57  | -2702.032847        | 7.23   | -2702.698250                  | 10.46  | -2702.052525                       | 7.13   |
| <sup>2</sup> INT <sub>m</sub>    | -2702.044057 | 6.19   | -2701.394465   | 5.29   | -2702.694524    | 0.55   | -2702.044932        | -0.35  | -2702.714213                  | 0.44   | -2702.064621                       | -0.46  |
| <sup>4</sup> INT <sub>m</sub>    | -2702.043395 | 6.61   | -2701.393803   | 5.70   | -2702.694141    | 0.80   | -2702.044549        | -0.11  | -2702.713534                  | 0.87   | -2702.063942                       | -0.04  |
| <sup>4</sup> TS-reb <sub>m</sub> | -2702.035909 | 11.31  | -2701.390865   | 7.55   | -2702.681256    | 8.88   | -2702.036226        | 5.11   | -2702.704014                  | 6.84   | -2702.056984                       | 4.33   |
| <sup>2</sup> P-OH <sub>m</sub>   | -2702.149604 | -60.04 | -2701.495695   | -58.24 | -2702.799961    | -65.61 | -2702.146052        | -63.81 | -2702.818709                  | -65.13 | -2702.164800                       | -63.32 |
| <sup>4</sup> P-OH <sub>m</sub>   | -2702.148072 | -59.08 | -2701.495317   | -58.00 | -2702.799943    | -65.60 | -2702.147188        | -64.52 | -2702.821751                  | -67.04 | -2702.168996                       | -65.96 |

**Table S2. Relative energy (RE) (in kcal/mol) and atomic energy (in a.u.) at the B3LYP level of theory for the secondary amine hydroxylation of paroxetine by P450 (Cpd I) by HAT mechanism.**

|                                  | UB3LYP/BS1   |        | UB3LYP/BS1+ZPE |        | UB3LYP/BS2//BS1 |        | UB3LYP/BS2//BS1+ZPE |        | UB3LYP/BS2//BS1 +Bulk Polarity |        | UB3LYP/BS2//BS1+ZPE+Bu lk Polarity |        |
|----------------------------------|--------------|--------|----------------|--------|-----------------|--------|---------------------|--------|--------------------------------|--------|------------------------------------|--------|
|                                  | AE           | RE     | AE             | RE     | AE              | RE     | AE                  | RE     | AE                             | RE     | AE                                 | RE     |
| <sup>2</sup> RC                  | -2702.057005 | 0.00   | -2701.405768   | 0.00   | -2702.698107    | 0.00   | -2702.046870        | -0.11  | -2702.716480                   | 0.02   | -2702.065243                       | 0.08   |
| <sup>4</sup> RC                  | -2702.056554 | 0.28   | -2701.405402   | 0.23   | -2702.697845    | 0.16   | -2702.046693        | 0.00   | -2702.716516                   | 0.00   | -2702.065364                       | 0.00   |
| <sup>2</sup> TS <sub>H</sub>     | -2702.037043 | 12.53  | -2701.392800   | 8.14   | -2702.681918    | 10.16  | -2702.037675        | 5.66   | -2702.704990                   | 7.23   | -2702.060747                       | 2.90   |
| <sup>4</sup> TS <sub>H</sub>     | -2702.036797 | 12.68  | -2701.392420   | 8.38   | -2702.682472    | 9.81   | -2702.038095        | 5.40   | -2702.705669                   | 6.81   | -2702.061292                       | 2.56   |
| <sup>2</sup> INT <sub>H</sub>    | -2702.050805 | 3.89   | -2701.402430   | 2.09   | -2702.698198    | -0.06  | -2702.049823        | -1.96  | -2702.718408                   | -1.19  | -2702.070033                       | -2.93  |
| <sup>4</sup> INT <sub>H</sub>    | -2702.053540 | 2.17   | -2701.404657   | 0.70   | -2702.701113    | -1.89  | -2702.052230        | -3.47  | -2702.719993                   | -2.18  | -2702.071110                       | -3.61  |
| <sup>2</sup> TS-reb <sub>H</sub> | -2702.036672 | 12.76  | -2701.388336   | 10.94  | -2702.684986    | 8.23   | -2702.036650        | 6.30   | -2702.702574                   | 8.75   | -2702.054238                       | 6.98   |
| <sup>4</sup> TS-reb <sub>H</sub> | -2702.037573 | 12.19  | -2701.389252   | 10.36  | -2702.685314    | 8.03   | -2702.037665        | 5.67   | -2702.703014                   | 8.47   | -2702.054693                       | 6.70   |
| <sup>2</sup> P-OH                | -2702.088946 | -20.04 | -2701.436230   | -19.12 | -2702.735781    | -23.64 | -2702.083065        | -22.82 | -2702.753607                   | -23.28 | -2702.100891                       | -22.29 |
| <sup>4</sup> P-OH                | -2702.083788 | -16.81 | -2701.432803   | -16.96 | -2702.712972    | -9.33  | -2702.061987        | -9.60  | -2702.734468                   | -11.27 | -2702.083483                       | -11.37 |

**Table S3. Relative energy (RE) (in kcal/mol) and atomic energy (in a.u.) at the B3LYP level of theory for the secondary amine hydroxylation of paroxetine by P450 (Cpd I) by OAR mechanism.**

|                                  | UB3LYP/BS1   |        | UB3LYP/BS1+ZPE |        | UB3LYP/BS2//BS1 |        | UB3LYP/BS2//BS1+ZPE |        | UB3LYP/BS2//BS1 +Bulk Polarity |        | UB3LYP/BS2//BS1+ZPE+Bulk Polarity |        |
|----------------------------------|--------------|--------|----------------|--------|-----------------|--------|---------------------|--------|--------------------------------|--------|-----------------------------------|--------|
|                                  | AE           | RE     | AE             | RE     | AE              | RE     | AE                  | RE     | AE                             | RE     | AE                                | RE     |
| <sup>2</sup> TS <sub>O</sub>     | -2702.038069 | 11.88  | -2701.388454   | 10.86  | -2702.680964    | 10.76  | -2702.031349        | 9.63   | -2702.703778                   | 7.99   | -2702.054163                      | 7.03   |
| <sup>4</sup> TS <sub>O</sub>     | -2702.04384  | 8.26   | -2701.394634   | 6.99   | -2702.686465    | 7.31   | -2702.037259        | 5.92   | -2702.705561                   | 6.87   | -2702.056355                      | 5.65   |
| <sup>2</sup> INT <sub>O</sub>    | -2702.093278 | -22.76 | -2701.437895   | -20.16 | -2702.737628    | -24.80 | -2702.082245        | -22.31 | -2702.761985                   | -28.53 | -2702.106602                      | -25.88 |
| <sup>4</sup> INT <sub>O</sub>    | -2702.071242 | -8.93  | -2701.418825   | -8.19  | -2702.717036    | -11.88 | -2702.064619        | -11.25 | -2702.739841                   | -14.64 | -2702.087424                      | -13.84 |
| <sup>2</sup> TS-reb <sub>O</sub> | -2702.024399 | 20.46  | -2701.376651   | 18.27  | -2702.67124     | 16.86  | -2702.023492        | 14.56  | -2702.691235                   | 15.86  | -2702.043487                      | 13.73  |
| <sup>4</sup> TS-reb <sub>O</sub> | -2702.003709 | 33.44  | -2701.358247   | 29.82  | -2702.651859    | 29.02  | -2702.006397        | 25.29  | -2702.67117                    | 28.45  | -2702.025708                      | 24.88  |

**Table S4. Relative energy (RE) (in kcal/mol) and atomic energy (in a.u.) at the B3LYP level of theory for the dehydration of hydroxylated paroxetine and coordination to the heme iron.**

|                                | UB3LYP/BS1   |        | UB3LYP/BS1+ZPE |        | UB3LYP/BS2//BS1 |        | UB3LYP/BS2//BS1+ZPE |        | UB3LYP/BS2//BS1 +Bulk Polarity |        | UB3LYP/BS2//BS1+ZPE+Bulk Polarity |        |
|--------------------------------|--------------|--------|----------------|--------|-----------------|--------|---------------------|--------|--------------------------------|--------|-----------------------------------|--------|
|                                | AE           | RE     | AE             | RE     | AE              | RE     | AE                  | RE     | AE                             | RE     | AE                                | RE     |
| <sup>2</sup> TS-D <sub>m</sub> | -2702.040988 | 8.12   | -2701.394067   | 5.54   | -2702.701781    | -4.00  | -2702.054860        | -6.58  | -2702.724136                   | -5.78  | -2702.077215                      | -8.36  |
| <sup>4</sup> TS-D <sub>m</sub> | -2702.023598 | 19.03  | -2701.379765   | 14.51  | -2702.685701    | 6.09   | -2702.041868        | 1.57   | -2702.709157                   | 3.62   | -2702.065324                      | -0.90  |
| <sup>2</sup> P-C <sub>m</sub>  | -2702.107394 | -33.55 | -2701.457409   | -34.21 | -2702.768517    | -45.88 | -2702.118536        | -46.54 | -2702.788882                   | -46.41 | -2702.138900                      | -47.07 |
| <sup>4</sup> P-C <sub>m</sub>  | -2702.082272 | -17.79 | -2701.434563   | -19.87 | -2702.734384    | -24.46 | -2702.086675        | -26.55 | -2702.754421                   | -24.79 | -2702.106712                      | -26.87 |
| <sup>2</sup> TS-D <sub>N</sub> | -2702.002797 | 34.02  | -2701.357845   | 30.07  | -2702.656618    | 26.03  | -2702.011666        | 22.09  | -2702.674818                   | 26.14  | -2702.029866                      | 22.20  |
| <sup>4</sup> TS-D <sub>N</sub> | -2701.994945 | 38.94  | -2701.352128   | 33.66  | -2702.630323    | 42.53  | -2701.987506        | 37.25  | -2702.652463                   | 40.17  | -2702.009646                      | 34.89  |
| <sup>2</sup> P-C <sub>N</sub>  | -2702.146289 | -56.03 | -2701.495535   | -56.33 | -2702.806991    | -68.33 | -2702.156237        | -68.63 | -2702.828308                   | -70.17 | -2702.177554                      | -70.48 |
| <sup>4</sup> P-C <sub>N</sub>  | -2702.124591 | -42.41 | -2701.476451   | -44.35 | -2702.784326    | -54.10 | -2702.136186        | -56.05 | -2702.807135                   | -56.89 | -2702.158995                      | -58.83 |

**Cartesian coordinates of all structures discussed in this work.**

**Methylenedioxo inactivation**

**<sup>2</sup>RCm**

|    |          |          |          |
|----|----------|----------|----------|
| Fe | -4.23493 | 0.31347  | 0.14522  |
| O  | -3.45149 | 0.48284  | -1.2717  |
| S  | -5.35131 | -0.30342 | 2.37686  |
| H  | -6.56094 | -0.65781 | 1.8865   |
| N  | -4.49631 | -1.68136 | -0.08126 |
| C  | -5.28564 | -3.73163 | -0.808   |
| C  | -4.08818 | -3.95443 | -0.20327 |
| H  | -5.95311 | -4.44889 | -1.26817 |
| H  | -3.56754 | -4.89281 | -0.06269 |
| N  | -2.55547 | -0.05    | 1.20517  |
| C  | -1.9151  | -1.25357 | 1.35011  |
| C  | -0.67505 | -1.08114 | 2.06798  |
| C  | -0.57458 | 0.24317  | 2.36084  |
| H  | 0.01571  | -1.88029 | 2.3026   |
| H  | 0.21515  | 0.7595   | 2.8911   |
| N  | -4.12024 | 2.26012  | 0.6382   |
| C  | -3.10935 | 2.8798   | 1.31974  |
| C  | -4.99132 | 3.25241  | 0.27503  |
| C  | -3.34626 | 4.3012   | 1.39239  |
| C  | -4.51762 | 4.53363  | 0.73961  |
| H  | -2.6931  | 5.01129  | 1.88307  |
| H  | -5.0291  | 5.47458  | 0.58246  |
| N  | -6.05568 | 0.62747  | -0.66516 |
| C  | -7.90334 | 1.66758  | -1.58404 |
| H  | -8.57428 | 2.47145  | -1.85853 |
| C  | -6.66684 | 1.83966  | -0.86184 |
| C  | -5.52816 | -2.31124 | -0.74291 |
| C  | -3.59768 | -2.67285 | 0.24055  |
| C  | -1.74632 | 0.88013  | 1.81077  |
| C  | -6.17636 | 3.06278  | -0.42519 |
| H  | -6.76998 | 3.94467  | -0.64633 |
| C  | -6.62879 | -1.67319 | -1.29014 |
| H  | -7.36425 | -2.29338 | -1.79366 |
| C  | -2.38897 | -2.47491 | 0.88767  |
| H  | -1.76517 | -3.3463  | 1.05756  |
| C  | -2.00454 | 2.24082  | 1.8739   |
| H  | -1.27814 | 2.86185  | 2.38924  |
| C  | -8.03004 | 0.33434  | -1.82792 |
| H  | -8.82645 | -0.18552 | -2.3449  |
| C  | -6.87007 | -0.30256 | -1.25354 |
| C  | 1.45377  | -1.03754 | -1.16679 |
| C  | 0.87715  | -2.294   | -1.32528 |
| C  | 1.55826  | -3.44402 | -0.97141 |
| C  | 2.85409  | -3.295   | -0.45252 |
| C  | 3.43265  | -2.02857 | -0.29808 |
| C  | 2.72912  | -0.85959 | -0.65751 |
| C  | -0.51023 | -0.77755 | -2.19517 |
| H  | 1.1115   | -4.42532 | -1.09312 |

|                        |          |          |          |
|------------------------|----------|----------|----------|
| H                      | 3.4381   | -4.1634  | -0.16684 |
| H                      | 3.14654  | 0.13327  | -0.55166 |
| H                      | -0.38343 | -0.69738 | -3.28542 |
| H                      | -1.46788 | -0.37092 | -1.86715 |
| O                      | 0.56529  | -0.06902 | -1.55119 |
| O                      | -0.40516 | -2.15631 | -1.80949 |
| O                      | 4.703    | -2.01769 | 0.21698  |
| C                      | 5.36591  | -0.76775 | 0.38311  |
| H                      | 5.43232  | -0.24251 | -0.57921 |
| H                      | 4.79851  | -0.12997 | 1.07827  |
| C                      | 6.75705  | -1.05303 | 0.94137  |
| C                      | 7.58293  | -1.92374 | -0.02963 |
| C                      | 7.49945  | 0.24579  | 1.37013  |
| N                      | 9.02509  | -1.81914 | 0.25396  |
| H                      | 7.21155  | -2.95731 | 0.04156  |
| C                      | 8.87017  | -0.14082 | 2.02038  |
| C                      | 9.31927  | -1.56891 | 1.66421  |
| H                      | 9.63467  | 0.56927  | 1.69048  |
| H                      | 10.40037 | -1.6645  | 1.81413  |
| H                      | 9.50283  | -2.65604 | -0.06882 |
| H                      | 6.60569  | -1.63004 | 1.86378  |
| H                      | 7.4077   | -1.59384 | -1.06284 |
| H                      | 8.84152  | -2.3006  | 2.3435   |
| H                      | 8.8008   | -0.04992 | 3.11131  |
| H                      | 6.8788   | 0.70095  | 2.15243  |
| C                      | 7.61355  | 1.29288  | 0.26481  |
| C                      | 6.79818  | 2.434    | 0.3038   |
| C                      | 8.51421  | 1.16377  | -0.80683 |
| C                      | 6.8619   | 3.41652  | -0.68635 |
| H                      | 6.10119  | 2.56557  | 1.12877  |
| C                      | 8.59218  | 2.13519  | -1.80485 |
| H                      | 9.15781  | 0.28882  | -0.84833 |
| C                      | 7.76259  | 3.24839  | -1.72976 |
| H                      | 6.23385  | 4.30097  | -0.65377 |
| H                      | 9.28572  | 2.04057  | -2.63454 |
| F                      | 7.83769  | 4.19267  | -2.69351 |
| <b><sup>4</sup>RCm</b> |          |          |          |
| Fe                     | -4.22618 | 0.30101  | 0.14764  |
| O                      | -3.45787 | 0.51585  | -1.27352 |
| S                      | -5.32354 | -0.29355 | 2.37943  |
| H                      | -6.53563 | -0.65415 | 1.89983  |
| N                      | -4.48352 | -1.68719 | -0.08432 |
| C                      | -5.28318 | -3.74004 | -0.79294 |
| C                      | -4.08323 | -3.96252 | -0.19317 |
| H                      | -5.95533 | -4.45822 | -1.24479 |
| H                      | -3.56459 | -4.90151 | -0.04931 |
| N                      | -2.53733 | -0.05762 | 1.19123  |
| C                      | -1.89593 | -1.26044 | 1.33601  |
| C                      | -0.65243 | -1.08652 | 2.04725  |
| C                      | -0.55093 | 0.23842  | 2.33687  |
| H                      | 0.03992  | -1.88493 | 2.27964  |

|   |          |          |          |
|---|----------|----------|----------|
| H | 0.24128  | 0.75596  | 2.86223  |
| N | -4.11088 | 2.2528   | 0.64316  |
| C | -3.09344 | 2.87391  | 1.31201  |
| C | -4.98661 | 3.24304  | 0.28781  |
| C | -3.33002 | 4.29571  | 1.3845   |
| C | -4.50894 | 4.52594  | 0.74479  |
| H | -2.67161 | 5.00722  | 1.86604  |
| H | -5.02268 | 5.46624  | 0.59114  |
| N | -6.05302 | 0.61599  | -0.65218 |
| C | -7.90907 | 1.65623  | -1.55394 |
| H | -8.58364 | 2.45981  | -1.82029 |
| C | -6.6684  | 1.82797  | -0.83857 |
| C | -5.52204 | -2.3189  | -0.73486 |
| C | -3.58667 | -2.67988 | 0.2401   |
| C | -1.72579 | 0.87422  | 1.79221  |
| C | -6.17828 | 3.05076  | -0.40066 |
| H | -6.77655 | 3.93141  | -0.61424 |
| C | -6.62562 | -1.68293 | -1.27813 |
| H | -7.36326 | -2.3048  | -1.77634 |
| C | -2.37365 | -2.48229 | 0.87892  |
| H | -1.75102 | -3.35455 | 1.04891  |
| C | -1.98382 | 2.23479  | 1.85686  |
| H | -1.25314 | 2.85576  | 2.36622  |
| C | -8.03401 | 0.32397  | -1.80398 |
| H | -8.83235 | -0.19529 | -2.31859 |
| C | -6.86919 | -0.31268 | -1.23918 |
| C | 1.43769  | -0.98926 | -1.18223 |
| C | 0.85232  | -2.23987 | -1.35428 |
| C | 1.52239  | -3.39797 | -1.00571 |
| C | 2.81634  | -3.26317 | -0.47835 |
| C | 3.40392  | -2.00251 | -0.31058 |
| C | 2.71148  | -0.82528 | -0.66442 |
| C | -0.51881 | -0.70584 | -2.21875 |
| H | 1.06881  | -4.37475 | -1.13807 |
| H | 3.39214  | -4.13833 | -0.19667 |
| H | 3.13585  | 0.16345  | -0.5481  |
| H | -0.386   | -0.61723 | -3.30763 |
| H | -1.47525 | -0.29487 | -1.8921  |
| O | 0.55875  | -0.01085 | -1.56348 |
| O | -0.426   | -2.08838 | -1.84455 |
| O | 4.67136  | -2.00577 | 0.21152  |
| C | 5.34599  | -0.76307 | 0.38484  |
| H | 5.42003  | -0.23432 | -0.57499 |
| H | 4.78319  | -0.12278 | 1.08145  |
| C | 6.73291  | -1.06427 | 0.94525  |
| C | 7.55118  | -1.94189 | -0.02602 |
| C | 7.48823  | 0.22601  | 1.37763  |
| N | 8.99386  | -1.85308 | 0.26013  |
| H | 7.16872  | -2.97159 | 0.04264  |
| C | 8.8542   | -0.17579 | 2.02863  |
| C | 9.28821  | -1.60817 | 1.67128  |
| H | 9.62652  | 0.52634  | 1.69993  |

|                          |          |          |          |
|--------------------------|----------|----------|----------|
| H                        | 10.36792 | -1.7158  | 1.823    |
| H                        | 9.4632   | -2.69454 | -0.06313 |
| H                        | 6.57393  | -1.64131 | 1.86634  |
| H                        | 7.38105  | -1.60833 | -1.05894 |
| H                        | 8.80121  | -2.33556 | 2.34863  |
| H                        | 8.78502  | -0.08521 | 3.11959  |
| H                        | 6.87129  | 0.68589  | 2.16011  |
| C                        | 7.61412  | 1.27401  | 0.27451  |
| C                        | 6.81114  | 2.4238   | 0.31552  |
| C                        | 8.51362  | 1.13723  | -0.79715 |
| C                        | 6.88566  | 3.40746  | -0.67274 |
| H                        | 6.11543  | 2.56127  | 1.14062  |
| C                        | 8.60224  | 2.10962  | -1.79334 |
| H                        | 9.14786  | 0.25554  | -0.84016 |
| C                        | 7.78469  | 3.23156  | -1.71631 |
| H                        | 6.26724  | 4.2986   | -0.6386  |
| H                        | 9.29488  | 2.00908  | -2.6231  |
| F                        | 7.87015  | 4.17675  | -2.67829 |
| <b><sup>2</sup>TS-Hm</b> |          |          |          |
| Fe                       | -3.97183 | 0.2975   | 0.1852   |
| O                        | -2.34933 | -0.2602  | 0.40061  |
| S                        | -6.19196 | 1.26454  | 0.21722  |
| H                        | -6.62418 | 0.7366   | 1.38433  |
| N                        | -4.30902 | -0.63144 | -1.56545 |
| C                        | -4.55252 | -1.11161 | -3.81476 |
| C                        | -4.91728 | -2.22631 | -3.12529 |
| H                        | -4.53721 | -0.95401 | -4.88575 |
| H                        | -5.26527 | -3.1755  | -3.51256 |
| N                        | -4.64369 | -1.3128  | 1.21025  |
| C                        | -5.02809 | -2.50767 | 0.6683   |
| C                        | -5.36647 | -3.44769 | 1.71227  |
| C                        | -5.17259 | -2.80212 | 2.89442  |
| H                        | -5.70451 | -4.46234 | 1.54406  |
| H                        | -5.31738 | -3.17595 | 3.90009  |
| N                        | -3.73432 | 1.27304  | 1.95242  |
| C                        | -3.92511 | 0.77702  | 3.2162   |
| C                        | -3.25088 | 2.54342  | 2.1117   |
| C                        | -3.56575 | 1.77058  | 4.20334  |
| C                        | -3.14425 | 2.86633  | 3.51765  |
| H                        | -3.63202 | 1.62816  | 5.27453  |
| H                        | -2.79342 | 3.81331  | 3.90786  |
| N                        | -3.4483  | 1.95405  | -0.83152 |
| C                        | -2.71749 | 4.09006  | -1.32255 |
| H                        | -2.36594 | 5.09935  | -1.15008 |
| C                        | -3.02659 | 3.13933  | -0.28084 |
| C                        | -4.18134 | -0.12167 | -2.83135 |
| C                        | -4.77176 | -1.91408 | -1.72278 |
| C                        | -4.71551 | -1.47106 | 2.56816  |
| C                        | -2.91623 | 3.40831  | 1.07748  |
| H                        | -2.55333 | 4.39354  | 1.35532  |
| C                        | -3.75706 | 1.16965  | -3.13073 |

|   |          |          |          |
|---|----------|----------|----------|
| H | -3.70019 | 1.44782  | -4.17896 |
| C | -5.09162 | -2.7886  | -0.69256 |
| H | -5.4357  | -3.779   | -0.9761  |
| C | -4.3898  | -0.49788 | 3.50764  |
| H | -4.49604 | -0.76285 | 4.55548  |
| C | -2.96318 | 3.46964  | -2.50847 |
| H | -2.85471 | 3.86248  | -3.51144 |
| C | -3.4164  | 2.13657  | -2.19124 |
| C | 1.20378  | -0.94895 | -1.05121 |
| C | 0.58206  | -2.14119 | -1.40491 |
| C | 1.22609  | -3.36094 | -1.27235 |
| C | 2.52998  | -3.33141 | -0.77178 |
| C | 3.15833  | -2.12193 | -0.41463 |
| C | 2.49354  | -0.88858 | -0.54855 |
| C | -0.88703 | -0.49975 | -1.6337  |
| H | 0.74235  | -4.29237 | -1.5441  |
| H | 3.09171  | -4.25    | -0.64171 |
| H | 2.94235  | 0.05823  | -0.28003 |
| H | -1.3682  | 0.00649  | -2.47578 |
| H | -1.67405 | -0.37439 | -0.63303 |
| O | 0.34503  | 0.08661  | -1.29797 |
| O | -0.67524 | -1.86091 | -1.88001 |
| O | 4.42876  | -2.24739 | 0.06313  |
| C | 5.13757  | -1.06995 | 0.45535  |
| H | 5.19601  | -0.36975 | -0.388   |
| H | 4.60143  | -0.57243 | 1.27689  |
| C | 6.53224  | -1.49522 | 0.90382  |
| C | 7.30545  | -2.17486 | -0.24765 |
| C | 7.31883  | -0.32163 | 1.55762  |
| N | 8.75755  | -2.1452  | -0.00705 |
| H | 6.91556  | -3.19832 | -0.36021 |
| C | 8.7037   | -0.84959 | 2.06087  |
| C | 9.10678  | -2.18546 | 1.41238  |
| H | 9.47074  | -0.10004 | 1.84371  |
| H | 10.18984 | -2.32581 | 1.4981   |
| H | 9.20724  | -2.90569 | -0.50931 |
| H | 6.38704  | -2.24005 | 1.698    |
| H | 7.09893  | -1.65135 | -1.1912  |
| H | 8.63598  | -3.03012 | 1.95086  |
| H | 8.67869  | -0.97394 | 3.15027  |
| H | 6.73717  | -0.02703 | 2.44013  |
| C | 7.41312  | 0.92661  | 0.68365  |
| C | 6.64438  | 2.05567  | 1.00436  |
| C | 8.24982  | 0.99778  | -0.44399 |
| C | 6.69096  | 3.21906  | 0.2336   |
| H | 5.9999   | 2.03349  | 1.88062  |
| C | 8.30893  | 2.15136  | -1.22593 |
| H | 8.86041  | 0.13543  | -0.69956 |
| C | 7.52621  | 3.24591  | -0.87544 |
| H | 6.1001   | 4.0939   | 0.48497  |
| H | 8.95328  | 2.2126   | -2.09737 |
| F | 7.58378  | 4.36536  | -1.62956 |



**<sup>4</sup>TS-Hm**

|    |          |          |          |
|----|----------|----------|----------|
| Fe | -3.9846  | 0.29706  | 0.28765  |
| O  | -2.38891 | -0.33874 | 0.18214  |
| S  | -6.17836 | 1.17106  | 0.16226  |
| H  | -5.87827 | 2.47153  | 0.37782  |
| N  | -4.80105 | -1.3037  | -0.63134 |
| C  | -5.52894 | -2.79027 | -2.23815 |
| C  | -5.68472 | -3.3951  | -1.02902 |
| H  | -5.76136 | -3.17769 | -3.22199 |
| H  | -6.07274 | -4.38231 | -0.81241 |
| N  | -4.26351 | -0.56181 | 2.06181  |
| C  | -4.74955 | -1.82346 | 2.29915  |
| C  | -4.77895 | -2.08437 | 3.72002  |
| C  | -4.32285 | -0.96165 | 4.3354   |
| H  | -5.11903 | -3.00976 | 4.16736  |
| H  | -4.20732 | -0.77085 | 5.39481  |
| N  | -3.35189 | 1.98585  | 1.1843   |
| C  | -3.2168  | 2.19115  | 2.53076  |
| C  | -2.86774 | 3.11723  | 0.57149  |
| C  | -2.65967 | 3.49863  | 2.78165  |
| C  | -2.43982 | 4.07116  | 1.5667   |
| H  | -2.46086 | 3.90417  | 3.76558  |
| H  | -2.02423 | 5.04599  | 1.34478  |
| N  | -3.73315 | 1.19798  | -1.54063 |
| C  | -3.14987 | 2.68931  | -3.19884 |
| H  | -2.77118 | 3.59737  | -3.65087 |
| C  | -3.1972  | 2.43532  | -1.77807 |
| C  | -4.9673  | -1.48538 | -1.98341 |
| C  | -5.2202  | -2.4595  | -0.03297 |
| C  | -4.00775 | -0.01236 | 3.29252  |
| C  | -2.78556 | 3.33095  | -0.79726 |
| H  | -2.37772 | 4.2811   | -1.12841 |
| C  | -4.61896 | -0.58072 | -2.97603 |
| H  | -4.80859 | -0.87423 | -4.00396 |
| C  | -5.19396 | -2.71249 | 1.33399  |
| H  | -5.56039 | -3.67695 | 1.67148  |
| C  | -3.53143 | 1.26863  | 3.52133  |
| H  | -3.37687 | 1.56934  | 4.55287  |
| C  | -3.67803 | 1.5922   | -3.81123 |
| H  | -3.82212 | 1.41441  | -4.86953 |
| C  | -4.04412 | 0.66711  | -2.76431 |
| C  | 1.20244  | -0.84023 | -1.186   |
| C  | 0.58638  | -2.00434 | -1.63749 |
| C  | 1.21217  | -3.23851 | -1.54265 |
| C  | 2.49079  | -3.25286 | -0.98326 |
| C  | 3.11548  | -2.0715  | -0.53201 |
| C  | 2.46968  | -0.82545 | -0.62342 |
| C  | -0.85361 | -0.33112 | -1.85008 |
| H  | 0.73213  | -4.14689 | -1.88873 |
| H  | 3.0382   | -4.18354 | -0.88097 |
| H  | 2.91545  | 0.09887  | -0.28151 |

|                         |          |          |          |
|-------------------------|----------|----------|----------|
| H                       | -1.25685 | 0.21949  | -2.70238 |
| H                       | -1.72055 | -0.27396 | -0.84376 |
| O                       | 0.37024  | 0.21691  | -1.41057 |
| O                       | -0.63816 | -1.68557 | -2.15907 |
| O                       | 4.36274  | -2.24008 | -0.01086 |
| C                       | 5.08907  | -1.08931 | 0.42717  |
| H                       | 5.17121  | -0.36568 | -0.39403 |
| H                       | 4.55207  | -0.60671 | 1.25695  |
| C                       | 6.46951  | -1.55482 | 0.87901  |
| C                       | 7.23608  | -2.23175 | -0.27846 |
| C                       | 7.27781  | -0.41039 | 1.55797  |
| N                       | 8.68617  | -2.2431  | -0.02462 |
| H                       | 6.82209  | -3.24281 | -0.41376 |
| C                       | 8.64575  | -0.97929 | 2.06323  |
| C                       | 9.02171  | -2.31427 | 1.39696  |
| H                       | 9.43217  | -0.24516 | 1.86345  |
| H                       | 10.1002  | -2.48264 | 1.4896   |
| H                       | 9.12107  | -3.00671 | -0.53508 |
| H                       | 6.30196  | -2.30972 | 1.65915  |
| H                       | 7.05111  | -1.68564 | -1.21366 |
| H                       | 8.52558  | -3.15536 | 1.91803  |
| H                       | 8.60927  | -1.11986 | 3.15032  |
| H                       | 6.69623  | -0.11576 | 2.44057  |
| C                       | 7.4094   | 0.84844  | 0.70404  |
| C                       | 6.66257  | 1.98971  | 1.03321  |
| C                       | 8.25955  | 0.91711  | -0.41365 |
| C                       | 6.74334  | 3.16267  | 0.27998  |
| H                       | 6.00823  | 1.96952  | 1.90218  |
| C                       | 8.35276  | 2.08015  | -1.17806 |
| H                       | 8.85315  | 0.04482  | -0.67552 |
| C                       | 7.59082  | 3.18676  | -0.81983 |
| H                       | 6.16956  | 4.0469   | 0.53799  |
| H                       | 9.00756  | 2.13934  | -2.04182 |
| F                       | 7.68125  | 4.31533  | -1.55688 |
| <b><sup>2</sup>INTm</b> |          |          |          |
| Fe                      | 4.07342  | 0.22675  | -0.29685 |
| O                       | 3.54192  | 0.15934  | 1.39539  |
| S                       | 4.83952  | 0.40188  | -2.48619 |
| H                       | 4.93535  | -0.91838 | -2.75882 |
| N                       | 3.92556  | -1.77338 | -0.50743 |
| C                       | 4.3655   | -4.03187 | -0.38378 |
| C                       | 3.09607  | -3.89472 | -0.85713 |
| H                       | 4.92028  | -4.94152 | -0.19189 |
| H                       | 2.39112  | -4.66831 | -1.13408 |
| N                       | 2.16138  | 0.42737  | -0.92559 |
| C                       | 1.30953  | -0.58009 | -1.30849 |
| C                       | 0.05573  | -0.02179 | -1.75011 |
| C                       | 0.16761  | 1.33131  | -1.64662 |
| H                       | -0.7871  | -0.60676 | -2.09508 |
| H                       | -0.56271 | 2.09113  | -1.89445 |
| N                       | 4.27387  | 2.22993  | -0.26793 |

|   |          |          |          |
|---|----------|----------|----------|
| C | 3.30709  | 3.15834  | -0.55911 |
| C | 5.38129  | 2.93369  | 0.13268  |
| C | 3.82749  | 4.48822  | -0.35935 |
| C | 5.11251  | 4.3489   | 0.06778  |
| H | 3.26505  | 5.3985   | -0.52366 |
| H | 5.82512  | 5.12105  | 0.32835  |
| N | 5.96537  | 0.02124  | 0.37155  |
| C | 8.08847  | 0.4738   | 1.14413  |
| H | 8.9425   | 1.06063  | 1.45755  |
| C | 6.83602  | 1.02923  | 0.68753  |
| C | 4.87399  | -2.70208 | -0.15696 |
| C | 2.82268  | -2.48058 | -0.91745 |
| C | 1.49098  | 1.60562  | -1.14581 |
| C | 6.57721  | 2.38676  | 0.57442  |
| H | 7.36685  | 3.07436  | 0.85981  |
| C | 6.13334  | -2.42491 | 0.35576  |
| H | 6.77808  | -3.26822 | 0.58166  |
| C | 1.60576  | -1.93513 | -1.30281 |
| H | 0.82542  | -2.62078 | -1.61677 |
| C | 2.01048  | 2.87885  | -0.96648 |
| H | 1.35781  | 3.72079  | -1.17372 |
| C | 7.96149  | -0.87936 | 1.08901  |
| H | 8.68957  | -1.63802 | 1.34661  |
| C | 6.63204  | -1.15333 | 0.59564  |
| C | -1.23692 | -0.68235 | 1.71528  |
| C | -0.62414 | -1.8674  | 2.09646  |
| C | -1.21947 | -3.09793 | 1.86926  |
| C | -2.46771 | -3.0844  | 1.24098  |
| C | -3.08859 | -1.88048 | 0.85575  |
| C | -2.47332 | -0.63632 | 1.08954  |
| C | 0.75243  | -0.2034  | 2.54372  |
| H | -0.74217 | -4.02496 | 2.16653  |
| H | -2.99118 | -4.01154 | 1.03403  |
| H | -2.91907 | 0.30726  | 0.80505  |
| H | 1.18234  | 0.30109  | 3.40772  |
| H | 2.55876  | 0.09707  | 1.45067  |
| O | -0.42395 | 0.36544  | 2.06547  |
| O | 0.57957  | -1.56984 | 2.69477  |
| O | -4.30067 | -2.02255 | 0.24609  |
| C | -5.00518 | -0.85367 | -0.17597 |
| H | -5.19319 | -0.19748 | 0.68397  |
| H | -4.39758 | -0.2966  | -0.90474 |
| C | -6.31524 | -1.3087  | -0.81104 |
| C | -7.19275 | -2.07401 | 0.20317  |
| C | -7.07017 | -0.13805 | -1.50493 |
| N | -8.60047 | -2.10583 | -0.22786 |
| H | -6.76601 | -3.08072 | 0.33053  |
| C | -8.34859 | -0.7029  | -2.21057 |
| C | -8.76013 | -2.08834 | -1.68129 |
| H | -9.17602 | -0.00224 | -2.06305 |
| H | -9.8138  | -2.27522 | -1.91556 |
| H | -9.06859 | -2.91265 | 0.1754   |

|                         |          |          |          |
|-------------------------|----------|----------|----------|
| H                       | -6.04142 | -2.00708 | -1.61336 |
| H                       | -7.14035 | -1.58027 | 1.1833   |
| H                       | -8.17881 | -2.88061 | -2.19042 |
| H                       | -8.1758  | -0.76998 | -3.29153 |
| H                       | -6.39604 | 0.23133  | -2.2881  |
| C                       | -7.34482 | 1.05521  | -0.59276 |
| C                       | -6.60162 | 2.23445  | -0.75258 |
| C                       | -8.32675 | 1.02648  | 0.413    |
| C                       | -6.81266 | 3.35116  | 0.05873  |
| H                       | -5.84686 | 2.28994  | -1.53422 |
| C                       | -8.55122 | 2.13215  | 1.23327  |
| H                       | -8.91915 | 0.12416  | 0.54148  |
| C                       | -7.78843 | 3.27929  | 1.0442   |
| H                       | -6.24185 | 4.26527  | -0.06888 |
| H                       | -9.30833 | 2.11618  | 2.01096  |
| F                       | -8.00537 | 4.35252  | 1.83516  |
| <b><sup>4</sup>INTm</b> |          |          |          |
| Fe                      | -4.11435 | 0.22754  | 0.29496  |
| O                       | -3.55524 | 0.16089  | -1.39283 |
| S                       | -4.83587 | 0.39704  | 2.49456  |
| H                       | -4.89121 | -0.9229  | 2.77936  |
| N                       | -3.96556 | -1.77415 | 0.50067  |
| C                       | -4.40723 | -4.03181 | 0.37171  |
| C                       | -3.13587 | -3.89707 | 0.84051  |
| H                       | -4.96331 | -4.94038 | 0.17861  |
| H                       | -2.43031 | -4.67206 | 1.11185  |
| N                       | -2.19076 | 0.42243  | 0.92151  |
| C                       | -1.3397  | -0.58782 | 1.29473  |
| C                       | -0.08116 | -0.03409 | 1.73007  |
| C                       | -0.19125 | 1.31957  | 1.63281  |
| H                       | 0.76318  | -0.62205 | 2.06605  |
| H                       | 0.54244  | 2.07703  | 1.87774  |
| N                       | -4.30683 | 2.22981  | 0.27287  |
| C                       | -3.33525 | 3.15438  | 0.56601  |
| C                       | -5.4115  | 2.93901  | -0.12408 |
| C                       | -3.85224 | 4.48637  | 0.37193  |
| C                       | -5.13827 | 4.35297  | -0.05392 |
| H                       | -3.28648 | 5.39419  | 0.53836  |
| H                       | -5.8485  | 5.1284   | -0.31114 |
| N                       | -5.99649 | 0.02829  | -0.37444 |
| C                       | -8.11995 | 0.48654  | -1.14345 |
| H                       | -8.9733  | 1.07545  | -1.45478 |
| C                       | -6.86709 | 1.03922  | -0.68695 |
| C                       | -4.91483 | -2.70084 | 0.15038  |
| C                       | -2.86061 | -2.48339 | 0.90398  |
| C                       | -1.51775 | 1.59772  | 1.14141  |
| C                       | -6.60837 | 2.39584  | -0.56822 |
| H                       | -7.39754 | 3.08501  | -0.85089 |
| C                       | -6.17405 | -2.41898 | -0.36077 |
| H                       | -6.82213 | -3.25942 | -0.58765 |
| C                       | -1.64069 | -1.94208 | 1.28512  |

|   |          |          |          |
|---|----------|----------|----------|
| H | -0.86048 | -2.63137 | 1.59135  |
| C | -2.03798 | 2.87201  | 0.96783  |
| H | -1.38391 | 3.71308  | 1.17421  |
| C | -7.99559 | -0.86711 | -1.09096 |
| H | -8.72568 | -1.6236  | -1.34916 |
| C | -6.66726 | -1.14566 | -0.5993  |
| C | 1.27957  | -0.69143 | -1.72548 |
| C | 0.66745  | -1.8798  | -2.09875 |
| C | 1.26012  | -3.10834 | -1.85515 |
| C | 2.50486  | -3.09087 | -1.2191  |
| C | 3.12479  | -1.88439 | -0.84249 |
| C | 2.51214  | -0.64182 | -1.09209 |
| C | -0.70556 | -0.21737 | -2.57181 |
| H | 0.78371  | -4.03769 | -2.14672 |
| H | 3.0256   | -4.0168  | -1.00011 |
| H | 2.95803  | 0.30395  | -0.815   |
| H | -1.11828 | 0.27596  | -3.45077 |
| H | -2.5751  | 0.10033  | -1.43435 |
| O | 0.47222  | 0.35427  | -2.0914  |
| O | -0.53142 | -1.58807 | -2.70836 |
| O | 4.33404  | -2.02144 | -0.22462 |
| C | 5.03799  | -0.84913 | 0.18734  |
| H | 5.22703  | -0.20036 | -0.67802 |
| H | 4.43005  | -0.28522 | 0.91066  |
| C | 6.34762  | -1.29892 | 0.82723  |
| C | 7.22648  | -2.07073 | -0.18079 |
| C | 7.10149  | -0.12354 | 1.51422  |
| N | 8.63382  | -2.09954 | 0.25199  |
| H | 6.80006  | -3.07829 | -0.30206 |
| C | 8.37961  | -0.68318 | 2.22466  |
| C | 8.79173  | -2.07218 | 1.70542  |
| H | 9.20706  | 0.01652  | 2.07272  |
| H | 9.84511  | -2.25747 | 1.94229  |
| H | 9.10227  | -2.90921 | -0.14513 |
| H | 6.07302  | -1.99202 | 1.63388  |
| H | 7.17512  | -1.58338 | -1.16415 |
| H | 8.20974  | -2.86092 | 2.21928  |
| H | 8.20615  | -0.74265 | 3.30597  |
| H | 6.42648  | 0.2506   | 2.29434  |
| C | 7.37647  | 1.06391  | 0.59463  |
| C | 6.63258  | 2.24379  | 0.74605  |
| C | 8.35933  | 1.02912  | -0.41004 |
| C | 6.84381  | 3.35531  | -0.07232 |
| H | 5.87697  | 2.30388  | 1.52653  |
| C | 8.58399  | 2.12952  | -1.23731 |
| H | 8.95234  | 0.12631  | -0.53219 |
| C | 7.82049  | 3.27749  | -1.05642 |
| H | 6.27235  | 4.26991  | 0.04872  |
| H | 9.34174  | 2.10881  | -2.01428 |
| F | 8.03765  | 4.3457   | -1.85419 |

**<sup>4</sup>TS-reb m**

|    |          |          |          |
|----|----------|----------|----------|
| Fe | 4.11594  | 0.26919  | 0.14875  |
| O  | 2.16474  | 0.32045  | 0.01175  |
| S  | 6.39455  | 0.16852  | 0.3585   |
| H  | 6.65881  | 1.49331  | 0.28472  |
| N  | 3.92267  | -1.04846 | 1.66474  |
| C  | 3.72662  | -1.92441 | 3.79083  |
| C  | 3.78597  | -2.97531 | 2.92916  |
| H  | 3.63767  | -1.94004 | 4.87012  |
| H  | 3.75857  | -4.03474 | 3.15292  |
| N  | 4.15733  | -1.29949 | -1.14639 |
| C  | 4.13378  | -2.63734 | -0.84526 |
| C  | 4.26362  | -3.41944 | -2.05282 |
| C  | 4.37552  | -2.53505 | -3.08342 |
| H  | 4.27796  | -4.50191 | -2.08944 |
| H  | 4.49904  | -2.74307 | -4.13918 |
| N  | 4.2375   | 1.58695  | -1.38754 |
| C  | 4.36747  | 1.25969  | -2.71328 |
| C  | 4.26838  | 2.95687  | -1.32483 |
| C  | 4.47391  | 2.46054  | -3.51176 |
| C  | 4.41287  | 3.51316  | -2.65046 |
| H  | 4.58706  | 2.47662  | -4.58881 |
| H  | 4.46345  | 4.57165  | -2.87383 |
| N  | 4.0014   | 1.83461  | 1.4182   |
| C  | 3.96195  | 3.95371  | 2.33577  |
| H  | 3.98065  | 5.03578  | 2.37592  |
| C  | 4.05411  | 3.17211  | 1.12282  |
| C  | 3.816    | -0.72265 | 2.98831  |
| C  | 3.91035  | -2.41483 | 1.6009   |
| C  | 4.31485  | -1.21161 | -2.50558 |
| C  | 4.17928  | 3.70538  | -0.1555  |
| H  | 4.2145   | 4.78685  | -0.2478  |
| C  | 3.79192  | 0.56566  | 3.51039  |
| H  | 3.70172  | 0.65975  | 4.58877  |
| C  | 4.00878  | -3.16561 | 0.43502  |
| H  | 4.00311  | -4.24744 | 0.53251  |
| C  | 4.39475  | -0.02919 | -3.23604 |
| H  | 4.51382  | -0.12161 | -4.3119  |
| C  | 3.85382  | 3.06784  | 3.36316  |
| H  | 3.76681  | 3.27239  | 4.42306  |
| C  | 3.88009  | 1.74457  | 2.77918  |
| C  | -1.36676 | -1.36553 | -0.89734 |
| C  | -0.71906 | -2.46361 | -0.37549 |
| C  | -1.39921 | -3.49438 | 0.25508  |
| C  | -2.78022 | -3.34148 | 0.32711  |
| C  | -3.44727 | -2.21047 | -0.20681 |
| C  | -2.73748 | -1.17779 | -0.84701 |
| C  | 0.77564  | -1.14557 | -1.25024 |
| H  | -0.89092 | -4.35703 | 0.66918  |
| H  | -3.39131 | -4.0972  | 0.8081   |
| H  | -3.20898 | -0.29795 | -1.26271 |
| H  | 1.94583  | 1.24349  | -0.20354 |
| O  | -0.38655 | -0.55176 | -1.46089 |

|                          |           |          |          |
|--------------------------|-----------|----------|----------|
| O                        | 0.64102   | -2.29215 | -0.62995 |
| O                        | -4.79069  | -2.21679 | -0.05232 |
| C                        | -5.55397  | -1.09547 | -0.52435 |
| H                        | -5.19586  | -0.17934 | -0.03886 |
| H                        | -5.41431  | -0.99194 | -1.6097  |
| C                        | -7.01898  | -1.35638 | -0.19468 |
| C                        | -7.23957  | -1.48124 | 1.32962  |
| C                        | -7.95597  | -0.30726 | -0.86281 |
| N                        | -8.64469  | -1.23293 | 1.68374  |
| H                        | -6.89293  | -2.47887 | 1.64269  |
| C                        | -9.44384  | -0.68581 | -0.5575  |
| C                        | -9.58499  | -1.64111 | 0.6412   |
| H                        | -10.00957 | 0.22913  | -0.35808 |
| H                        | -10.59993 | -1.57706 | 1.04758  |
| H                        | -8.86583  | -1.68291 | 2.56758  |
| H                        | -7.27146  | -2.32198 | -0.653   |
| H                        | -6.61382  | -0.74715 | 1.85584  |
| H                        | -9.442    | -2.68909 | 0.31504  |
| H                        | -9.8943   | -1.15284 | -1.44154 |
| H                        | -7.8037   | -0.4149  | -1.94427 |
| C                        | -7.60162  | 1.14103  | -0.53208 |
| C                        | -6.98468  | 1.9422   | -1.50499 |
| C                        | -7.86874  | 1.71586  | 0.72278  |
| C                        | -6.63296  | 3.26879  | -1.24758 |
| H                        | -6.7836   | 1.52936  | -2.49145 |
| C                        | -7.52474  | 3.03933  | 0.9977   |
| H                        | -8.35553  | 1.11039  | 1.48306  |
| C                        | -6.90929  | 3.79677  | 0.00698  |
| H                        | -6.16211  | 3.89108  | -2.00171 |
| H                        | -7.72945  | 3.48861  | 1.96432  |
| F                        | -6.57615  | 5.07792  | 0.26884  |
| H                        | 1.58865   | -1.0999  | -2.02113 |
| <b><sup>2</sup>P-OHm</b> |           |          |          |
| Fe                       | -4.38385  | 0.38487  | 0.09935  |
| O                        | -1.52255  | -1.00397 | 0.27279  |
| S                        | -6.57244  | 0.74879  | -0.05831 |
| H                        | -6.52015  | 1.80979  | -0.8965  |
| N                        | -4.49758  | -1.61224 | -0.19568 |
| C                        | -4.90594  | -3.64222 | -1.23604 |
| C                        | -4.98403  | -3.85825 | 0.10698  |
| H                        | -5.02965  | -4.3553  | -2.04102 |
| H                        | -5.18737  | -4.78395 | 0.62989  |
| N                        | -4.42862  | 0.04472  | 2.07436  |
| C                        | -4.64208  | -1.14801 | 2.72952  |
| C                        | -4.72962  | -0.93567 | 4.15291  |
| C                        | -4.58339  | 0.40051  | 4.35804  |
| H                        | -4.88356  | -1.71938 | 4.88353  |
| H                        | -4.589    | 0.94498  | 5.29367  |
| N                        | -3.87707  | 2.28792  | 0.42195  |
| C                        | -3.92327  | 2.94698  | 1.62969  |
| C                        | -3.55516  | 3.2512   | -0.50992 |

|   |          |          |          |
|---|----------|----------|----------|
| C | -3.62056 | 4.34527  | 1.45305  |
| C | -3.38577 | 4.53284  | 0.12601  |
| H | -3.58513 | 5.07247  | 2.25419  |
| H | -3.12036 | 5.44617  | -0.39088 |
| N | -3.97585 | 0.63945  | -1.8482  |
| C | -3.56229 | 1.59786  | -3.91737 |
| H | -3.30546 | 2.36121  | -4.64068 |
| C | -3.64052 | 1.81049  | -2.49537 |
| C | -4.61175 | -2.24678 | -1.41977 |
| C | -4.74671 | -2.5936  | 0.74749  |
| C | -4.39661 | 1.00291  | 3.06071  |
| C | -3.43292 | 3.03179  | -1.87271 |
| H | -3.17494 | 3.87984  | -2.49932 |
| C | -4.43814 | -1.63783 | -2.65249 |
| H | -4.53315 | -2.26206 | -3.5355  |
| C | -4.78715 | -2.38291 | 2.11675  |
| H | -4.97309 | -3.24237 | 2.75309  |
| C | -4.1792  | 2.35632  | 2.85732  |
| H | -4.17841 | 2.99999  | 3.73151  |
| C | -3.86951 | 0.28976  | -4.13635 |
| H | -3.91356 | -0.24467 | -5.07674 |
| C | -4.12549 | -0.30037 | -2.84711 |
| C | 1.3928   | -1.24287 | -0.55845 |
| C | 0.87489  | -2.45757 | -0.98459 |
| C | 1.6583   | -3.59585 | -1.02446 |
| C | 2.99616  | -3.46831 | -0.62502 |
| C | 3.51545  | -2.23787 | -0.19837 |
| C | 2.7069   | -1.0835  | -0.15596 |
| C | -0.79441 | -0.96574 | -0.90371 |
| H | 1.25768  | -4.54786 | -1.35584 |
| H | 3.66002  | -4.32613 | -0.63713 |
| H | 3.07274  | -0.11909 | 0.17115  |
| H | -1.33345 | -0.46447 | -1.71132 |
| H | -2.39942 | -1.39519 | 0.08603  |
| O | 0.4147   | -0.27883 | -0.63072 |
| O | -0.44441 | -2.28393 | -1.3493  |
| O | 4.83445  | -2.25119 | 0.17196  |
| C | 5.45101  | -1.02768 | 0.56299  |
| H | 5.36537  | -0.28592 | -0.24253 |
| H | 4.94874  | -0.62045 | 1.45374  |
| C | 6.91543  | -1.32755 | 0.87009  |
| C | 7.63994  | -1.89874 | -0.36811 |
| C | 7.65166  | -0.10664 | 1.4932   |
| N | 9.10121  | -1.75237 | -0.2478  |
| H | 7.32879  | -2.94735 | -0.48928 |
| C | 9.11285  | -0.52737 | 1.86533  |
| C | 9.57314  | -1.8021  | 1.13552  |
| H | 9.79404  | 0.29315  | 1.61962  |
| H | 10.66778 | -1.84795 | 1.12614  |
| H | 9.56692  | -2.45894 | -0.81064 |
| H | 6.91428  | -2.10513 | 1.6459   |
| H | 7.31025  | -1.36395 | -1.26931 |



|                          |          |          |          |
|--------------------------|----------|----------|----------|
| H                        | 9.22493  | -2.70067 | 1.67974  |
| H                        | 9.18698  | -0.68951 | 2.94763  |
| H                        | 7.12324  | 0.11722  | 2.42854  |
| C                        | 7.57212  | 1.16579  | 0.65283  |
| C                        | 6.73089  | 2.21282  | 1.05831  |
| C                        | 8.31901  | 1.33991  | -0.5253  |
| C                        | 6.62222  | 3.39447  | 0.32232  |
| H                        | 6.15111  | 2.11064  | 1.97315  |
| C                        | 8.22365  | 2.51349  | -1.27333 |
| H                        | 8.9809   | 0.54011  | -0.84782 |
| C                        | 7.37412  | 3.52424  | -0.83781 |
| H                        | 5.97427  | 4.20564  | 0.63844  |
| H                        | 8.79838  | 2.6534   | -2.18356 |
| F                        | 7.28123  | 4.66379  | -1.5588  |
| <b><sup>4</sup>P-OHm</b> |          |          |          |
| Fe                       | -4.49522 | 0.38284  | 0.06955  |
| O                        | -1.4584  | -1.06851 | 0.35863  |
| S                        | -6.87208 | 0.73368  | -0.11386 |
| H                        | -6.81252 | 1.38559  | -1.29738 |
| N                        | -4.45931 | -1.63202 | -0.21831 |
| C                        | -4.7275  | -3.68861 | -1.24786 |
| C                        | -4.89414 | -3.88487 | 0.09033  |
| H                        | -4.77244 | -4.41769 | -2.04654 |
| H                        | -5.10524 | -4.80809 | 0.61444  |
| N                        | -4.5311  | 0.05338  | 2.05084  |
| C                        | -4.77001 | -1.14062 | 2.69528  |
| C                        | -4.88253 | -0.93005 | 4.11421  |
| C                        | -4.70704 | 0.40311  | 4.32993  |
| H                        | -5.06535 | -1.71294 | 4.83898  |
| H                        | -4.71532 | 0.9418   | 5.26872  |
| N                        | -3.94873 | 2.29065  | 0.4156   |
| C                        | -3.97705 | 2.94592  | 1.62556  |
| C                        | -3.66093 | 3.25626  | -0.52178 |
| C                        | -3.69227 | 4.34638  | 1.44527  |
| C                        | -3.49449 | 4.53891  | 0.11275  |
| H                        | -3.65001 | 5.073    | 2.24642  |
| H                        | -3.2566  | 5.45685  | -0.40928 |
| N                        | -3.99885 | 0.62452  | -1.86553 |
| C                        | -3.57608 | 1.59681  | -3.9211  |
| H                        | -3.3454  | 2.37114  | -4.64148 |
| C                        | -3.70975 | 1.81202  | -2.50617 |
| C                        | -4.47217 | -2.28739 | -1.43672 |
| C                        | -4.7426  | -2.60404 | 0.72376  |
| C                        | -4.48582 | 1.0076   | 3.04331  |
| C                        | -3.55386 | 3.04263  | -1.88642 |
| H                        | -3.32459 | 3.89704  | -2.51498 |
| C                        | -4.27343 | -1.68643 | -2.66866 |
| H                        | -4.29111 | -2.32251 | -3.5476  |
| C                        | -4.87833 | -2.38071 | 2.08393  |
| H                        | -5.08535 | -3.23739 | 2.71694  |
| C                        | -4.23655 | 2.35735  | 2.85223  |

|                                                       |          |          |          |
|-------------------------------------------------------|----------|----------|----------|
| H                                                     | -4.22956 | 2.99648  | 3.7292   |
| C                                                     | -3.78472 | 0.26779  | -4.14125 |
| H                                                     | -3.75905 | -0.27263 | -5.07878 |
| C                                                     | -4.04366 | -0.33189 | -2.86074 |
| C                                                     | 1.46585  | -1.27539 | -0.48739 |
| C                                                     | 0.95898  | -2.49236 | -0.92035 |
| C                                                     | 1.75712  | -3.61974 | -0.97866 |
| C                                                     | 3.09753  | -3.47844 | -0.59209 |
| C                                                     | 3.60523  | -2.24546 | -0.15915 |
| C                                                     | 2.78191  | -1.10255 | -0.09704 |
| C                                                     | -0.72987 | -1.01971 | -0.81321 |
| H                                                     | 1.36572  | -4.57394 | -1.31478 |
| H                                                     | 3.77233  | -4.32733 | -0.61973 |
| H                                                     | 3.13827  | -0.13656 | 0.23577  |
| H                                                     | -1.27123 | -0.52017 | -1.62092 |
| H                                                     | -2.36354 | -1.37475 | 0.15378  |
| O                                                     | 0.47483  | -0.32407 | -0.53741 |
| O                                                     | -0.36572 | -2.33286 | -1.26849 |
| O                                                     | 4.92836  | -2.24416 | 0.19708  |
| C                                                     | 5.53329  | -1.01471 | 0.58754  |
| H                                                     | 5.42658  | -0.26929 | -0.21208 |
| H                                                     | 5.03749  | -0.61982 | 1.48747  |
| C                                                     | 7.00573  | -1.29569 | 0.87332  |
| C                                                     | 7.72046  | -1.85352 | -0.3765  |
| C                                                     | 7.73424  | -0.06648 | 1.48927  |
| N                                                     | 9.18132  | -1.68969 | -0.27521 |
| H                                                     | 7.42049  | -2.90536 | -0.49752 |
| C                                                     | 9.20604  | -0.46847 | 1.83989  |
| C                                                     | 9.67231  | -1.73603 | 1.10158  |
| H                                                     | 9.87288  | 0.36121  | 1.58574  |
| H                                                     | 10.76722 | -1.76825 | 1.07749  |
| H                                                     | 9.64813  | -2.38944 | -0.8456  |
| H                                                     | 7.02609  | -2.07528 | 1.64684  |
| H                                                     | 7.37205  | -1.31944 | -1.27107 |
| H                                                     | 9.34261  | -2.63976 | 1.64885  |
| H                                                     | 9.29777  | -0.6311  | 2.92077  |
| H                                                     | 7.21614  | 0.14819  | 2.4325   |
| C                                                     | 7.62613  | 1.20667  | 0.65317  |
| C                                                     | 6.77719  | 2.24175  | 1.07307  |
| C                                                     | 8.35359  | 1.39307  | -0.53524 |
| C                                                     | 6.64224  | 3.42327  | 0.34128  |
| H                                                     | 6.21208  | 2.13026  | 1.99595  |
| C                                                     | 8.23178  | 2.5667   | -1.27935 |
| H                                                     | 9.02149  | 0.60289  | -0.86889 |
| C                                                     | 7.37528  | 3.5652   | -0.82946 |
| H                                                     | 5.98839  | 4.22525  | 0.66854  |
| H                                                     | 8.79142  | 2.71601  | -2.19745 |
| F                                                     | 7.25671  | 4.70473  | -1.54671 |
| <b>Secondary amine hydroxylation by HAT mechanism</b> |          |          |          |
| <sup>2</sup> RC                                       |          |          |          |
| Fe                                                    | 3.10556  | -0.37376 | -0.29726 |

|   |          |          |          |
|---|----------|----------|----------|
| O | 2.37028  | 0.36343  | 0.95536  |
| S | 4.36472  | -1.81074 | -2.00804 |
| H | 5.57568  | -1.22035 | -1.88866 |
| N | 4.42715  | -1.35139 | 0.88562  |
| C | 6.21776  | -1.80844 | 2.2777   |
| C | 5.34343  | -2.8434  | 2.39648  |
| H | 7.17051  | -1.67024 | 2.77254  |
| H | 5.43012  | -3.73243 | 3.0078   |
| N | 1.89685  | -1.99147 | -0.24598 |
| C | 2.03067  | -3.09699 | 0.55349  |
| C | 0.89616  | -3.97453 | 0.39157  |
| C | 0.07214  | -3.38675 | -0.51732 |
| H | 0.76827  | -4.91585 | 0.91042  |
| H | -0.87987 | -3.73606 | -0.89535 |
| N | 1.93478  | 0.44927  | -1.71074 |
| C | 0.74247  | -0.03304 | -2.1783  |
| C | 2.12143  | 1.65502  | -2.33388 |
| C | 0.15946  | 0.8899   | -3.12164 |
| C | 1.01814  | 1.94134  | -3.21791 |
| H | -0.78161 | 0.73641  | -3.63371 |
| H | 0.93037  | 2.83204  | -3.82655 |
| N | 4.45439  | 1.10238  | -0.5568  |
| C | 5.42968  | 3.10943  | -1.15735 |
| H | 5.54973  | 4.06033  | -1.66036 |
| C | 4.30087  | 2.22767  | -1.32606 |
| C | 5.63508  | -0.87422 | 1.34601  |
| C | 4.22522  | -2.54882 | 1.53451  |
| C | 0.70165  | -2.14718 | -0.90432 |
| C | 3.21953  | 2.48747  | -2.15691 |
| H | 3.23319  | 3.4186   | -2.7152  |
| C | 6.20063  | 0.3376   | 0.98584  |
| H | 7.15656  | 0.59325  | 1.43279  |
| C | 3.1068   | -3.35414 | 1.39392  |
| H | 3.07605  | -4.27026 | 1.97566  |
| C | 0.16449  | -1.24336 | -1.80825 |
| H | -0.79189 | -1.49595 | -2.25531 |
| C | 6.26693  | 2.50558  | -0.27014 |
| H | 7.21841  | 2.85693  | 0.10796  |
| C | 5.64675  | 1.25636  | 0.09866  |
| C | -6.2184  | -2.45954 | -0.37662 |
| C | -5.81991 | -3.78678 | -0.46701 |
| C | -4.59728 | -4.20308 | 0.02617  |
| C | -3.77599 | -3.23001 | 0.61495  |
| C | -4.18045 | -1.88924 | 0.70215  |
| C | -5.43304 | -1.47649 | 0.20035  |
| C | -7.77224 | -3.5766  | -1.52548 |
| H | -4.28846 | -5.24134 | -0.03317 |
| H | -2.80584 | -3.49518 | 1.02148  |
| H | -5.77842 | -0.4525  | 0.25521  |
| H | -7.6855  | -3.47328 | -2.61769 |
| H | -8.78049 | -3.89138 | -1.24264 |
| O | -7.47856 | -2.31653 | -0.90774 |

|                       |          |          |          |
|-----------------------|----------|----------|----------|
| O                     | -6.82312 | -4.53421 | -1.05493 |
| O                     | -3.28726 | -1.04322 | 1.29441  |
| C                     | -3.62389 | 0.33759  | 1.43399  |
| H                     | -3.85398 | 0.77021  | 0.45122  |
| H                     | -4.5173  | 0.43952  | 2.06881  |
| C                     | -2.42716 | 1.04204  | 2.06572  |
| C                     | -1.17872 | 0.93952  | 1.16349  |
| C                     | -2.75317 | 2.50674  | 2.47725  |
| N                     | -0.18127 | 1.96978  | 1.493    |
| H                     | -0.76942 | -0.07732 | 1.25636  |
| C                     | -1.50538 | 3.11929  | 3.19757  |
| C                     | -0.20696 | 2.34508  | 2.90399  |
| H                     | -1.38579 | 4.1599   | 2.87943  |
| H                     | 0.65907  | 2.98434  | 3.10767  |
| H                     | 0.74347  | 1.62289  | 1.23753  |
| H                     | -2.21465 | 0.50785  | 3.00161  |
| H                     | -1.4761  | 1.06581  | 0.1127   |
| H                     | -0.12024 | 1.4764   | 3.58521  |
| H                     | -1.6778  | 3.13598  | 4.28109  |
| H                     | -3.56448 | 2.44265  | 3.21397  |
| C                     | -3.2921  | 3.36628  | 1.33619  |
| C                     | -4.65415 | 3.70094  | 1.30212  |
| C                     | -2.46946 | 3.84668  | 0.30179  |
| C                     | -5.19435 | 4.481    | 0.27722  |
| H                     | -5.31051 | 3.3535   | 2.09721  |
| C                     | -2.99175 | 4.62737  | -0.72959 |
| H                     | -1.41058 | 3.59863  | 0.32059  |
| C                     | -4.34829 | 4.93223  | -0.72688 |
| H                     | -6.24706 | 4.74411  | 0.25435  |
| H                     | -2.36174 | 5.00252  | -1.53027 |
| F                     | -4.85593 | 5.69101  | -1.72538 |
| <b><sup>4</sup>RC</b> |          |          |          |
| Fe                    | -3.13009 | -0.37194 | 0.29091  |
| O                     | -2.37171 | 0.41306  | -0.92037 |
| S                     | -4.37173 | -1.8195  | 1.98865  |
| H                     | -5.59426 | -1.25672 | 1.85495  |
| N                     | -4.41725 | -1.35533 | -0.91363 |
| C                     | -6.192   | -1.83849 | -2.31752 |
| C                     | -5.30245 | -2.86105 | -2.42989 |
| H                     | -7.14313 | -1.71377 | -2.81901 |
| H                     | -5.37223 | -3.75126 | -3.04164 |
| N                     | -1.89369 | -1.96615 | 0.24268  |
| C                     | -2.00231 | -3.07132 | -0.56068 |
| C                     | -0.85759 | -3.9332  | -0.38824 |
| C                     | -0.05283 | -3.33666 | 0.53214  |
| H                     | -0.71034 | -4.87102 | -0.90829 |
| H                     | 0.89966  | -3.67371 | 0.91996  |
| N                     | -1.98697 | 0.4617   | 1.72873  |
| C                     | -0.79087 | -0.00203 | 2.20285  |
| C                     | -2.20107 | 1.65909  | 2.35777  |
| C                     | -0.23211 | 0.9248   | 3.15748  |

|   |          |          |          |
|---|----------|----------|----------|
| C | -1.11083 | 1.95945  | 3.25388  |
| H | 0.70748  | 0.78502  | 3.67614  |
| H | -1.04432 | 2.84761  | 3.86889  |
| N | -4.50366 | 1.0849   | 0.54408  |
| C | -5.51614 | 3.07216  | 1.14936  |
| H | -5.65697 | 4.01643  | 1.65941  |
| C | -4.37732 | 2.20477  | 1.32651  |
| C | -5.62998 | -0.89631 | -1.38151 |
| C | -4.19482 | -2.55098 | -1.56016 |
| C | -0.70433 | -2.10756 | 0.91604  |
| C | -3.31207 | 2.47325  | 2.17519  |
| H | -3.34868 | 3.39885  | 2.74163  |
| C | -6.21739 | 0.30605  | -1.02513 |
| H | -7.17204 | 0.54854  | -1.48204 |
| C | -3.06633 | -3.34063 | -1.41276 |
| H | -3.0181  | -4.25489 | -1.9962  |
| C | -0.19066 | -1.20121 | 1.83085  |
| H | 0.7645   | -1.44266 | 2.28669  |
| C | -6.3316  | 2.46537  | 0.24411  |
| H | -7.28238 | 2.80679  | -0.14469 |
| C | -5.68855 | 1.2282   | -0.12621 |
| C | 6.23246  | -2.46879 | 0.38988  |
| C | 5.83052  | -3.79476 | 0.48376  |
| C | 4.60618  | -4.20887 | -0.00698 |
| C | 3.78682  | -3.23488 | -0.597   |
| C | 4.19468  | -1.89539 | -0.68757 |
| C | 5.44903  | -1.48492 | -0.18829 |
| C | 7.78505  | -3.58755 | 1.53892  |
| H | 4.29458  | -5.24612 | 0.05512  |
| H | 2.81555  | -3.49833 | -1.00194 |
| H | 5.79708  | -0.46197 | -0.2457  |
| H | 7.70083  | -3.48179 | 2.63108  |
| H | 8.79186  | -3.90566 | 1.25466  |
| O | 7.49357  | -2.32793 | 0.91922  |
| O | 6.83236  | -4.54353 | 1.07224  |
| O | 3.30287  | -1.04818 | -1.28027 |
| C | 3.64448  | 0.33078  | -1.42581 |
| H | 3.87805  | 0.76637  | -0.44519 |
| H | 4.53712  | 0.42673  | -2.06263 |
| C | 2.44943  | 1.03763  | -2.05802 |
| C | 1.20219  | 0.94422  | -1.15289 |
| C | 2.78151  | 2.49894  | -2.47674 |
| N | 0.21067  | 1.98001  | -1.48234 |
| H | 0.78693  | -0.07055 | -1.24313 |
| C | 1.535    | 3.11486  | -3.19639 |
| C | 0.23327  | 2.34931  | -2.89496 |
| H | 1.42215  | 4.15764  | -2.88295 |
| H | -0.62987 | 2.99259  | -3.0982  |
| H | -0.71546 | 1.6417   | -1.22129 |
| H | 2.23263  | 0.50043  | -2.99121 |
| H | 1.5025   | 1.07038  | -0.10287 |
| H | 0.13926  | 1.47827  | -3.57232 |

|                                   |          |          |          |
|-----------------------------------|----------|----------|----------|
| H                                 | 1.70428  | 3.12537  | -4.28048 |
| H                                 | 3.59038  | 2.42729  | -3.21546 |
| C                                 | 3.32825  | 3.36082  | -1.34119 |
| C                                 | 4.69212  | 3.68849  | -1.31254 |
| C                                 | 2.51107  | 3.85034  | -0.30674 |
| C                                 | 5.23929  | 4.47045  | -0.2928  |
| H                                 | 5.34437  | 3.33394  | -2.1079  |
| C                                 | 3.04033  | 4.63305  | 0.71955  |
| H                                 | 1.45086  | 3.60771  | -0.32156 |
| C                                 | 4.39845  | 4.93074  | 0.71158  |
| H                                 | 6.29341  | 4.72817  | -0.2741  |
| H                                 | 2.41455  | 5.01524  | 1.5202   |
| F                                 | 4.91292  | 5.69147  | 1.70507  |
| <b><sup>2</sup>TS<sub>H</sub></b> |          |          |          |
| Fe                                | 3.22086  | -0.43723 | -0.30346 |
| O                                 | 2.01858  | -0.68187 | 0.87511  |
| S                                 | 4.9158   | -0.14731 | -1.97097 |
| H                                 | 5.81301  | 0.50177  | -1.19551 |
| N                                 | 4.6779   | -0.95305 | 0.99313  |
| C                                 | 6.24961  | -0.89928 | 2.68059  |
| C                                 | 6.14782  | -2.19113 | 2.26719  |
| H                                 | 6.88596  | -0.48442 | 3.45206  |
| H                                 | 6.68175  | -3.06061 | 2.62907  |
| N                                 | 3.08383  | -2.35057 | -0.93324 |
| C                                 | 3.78985  | -3.41764 | -0.44692 |
| C                                 | 3.37668  | -4.63133 | -1.11442 |
| C                                 | 2.41146  | -4.27939 | -2.0048  |
| H                                 | 3.78507  | -5.61343 | -0.91268 |
| H                                 | 1.86106  | -4.91081 | -2.6907  |
| N                                 | 1.86864  | 0.10465  | -1.70975 |
| C                                 | 1.19117  | -0.72539 | -2.56495 |
| C                                 | 1.43103  | 1.37358  | -1.97387 |
| C                                 | 0.29432  | 0.04381  | -3.39343 |
| C                                 | 0.44562  | 1.34783  | -3.02944 |
| H                                 | -0.34905 | -0.37384 | -4.15748 |
| H                                 | -0.044   | 2.22316  | -3.43791 |
| N                                 | 3.4576   | 1.50438  | 0.22398  |
| C                                 | 3.20239  | 3.79066  | 0.37171  |
| H                                 | 2.83265  | 4.78111  | 0.13747  |
| C                                 | 2.79363  | 2.58013  | -0.30085 |
| C                                 | 5.32471  | -0.13209 | 1.8786   |
| C                                 | 5.15821  | -2.21542 | 1.21476  |
| C                                 | 2.23681  | -2.84959 | -1.88465 |
| C                                 | 1.84425  | 2.52751  | -1.31586 |
| H                                 | 1.40797  | 3.46827  | -1.63836 |
| C                                 | 5.14131  | 1.23991  | 1.98919  |
| H                                 | 5.73168  | 1.76489  | 2.73393  |
| C                                 | 4.7558   | -3.36423 | 0.54731  |
| H                                 | 5.23128  | -4.29788 | 0.83137  |
| C                                 | 1.34783  | -2.10252 | -2.64595 |
| H                                 | 0.74106  | -2.63349 | -3.37282 |

|                                   |          |          |          |
|-----------------------------------|----------|----------|----------|
| C                                 | 4.12061  | 3.42716  | 1.31068  |
| H                                 | 4.65979  | 4.05731  | 2.00678  |
| C                                 | 4.27519  | 1.99576  | 1.2095   |
| C                                 | -6.93132 | -2.09945 | 0.3004   |
| C                                 | -6.82684 | -3.47463 | 0.46448  |
| C                                 | -5.67514 | -4.05267 | 0.9648   |
| C                                 | -4.61641 | -3.19448 | 1.29626  |
| C                                 | -4.72636 | -1.80821 | 1.12887  |
| C                                 | -5.90606 | -1.22625 | 0.62063  |
| C                                 | -8.78719 | -3.0399  | -0.50844 |
| H                                 | -5.59261 | -5.12587 | 1.09778  |
| H                                 | -3.68622 | -3.59164 | 1.68796  |
| H                                 | -6.0244  | -0.15979 | 0.47974  |
| H                                 | -8.79115 | -3.16765 | -1.60113 |
| H                                 | -9.8047  | -3.0625  | -0.10886 |
| O                                 | -8.17816 | -1.78252 | -0.1826  |
| O                                 | -8.01333 | -4.07715 | 0.09576  |
| O                                 | -3.62097 | -1.08048 | 1.49047  |
| C                                 | -3.64745 | 0.33295  | 1.33222  |
| H                                 | -3.85284 | 0.59646  | 0.28596  |
| H                                 | -4.44407 | 0.77047  | 1.95241  |
| C                                 | -2.28208 | 0.8602   | 1.76817  |
| C                                 | -1.16643 | 0.32137  | 0.86343  |
| C                                 | -2.24737 | 2.41679  | 1.89689  |
| N                                 | 0.13854  | 0.86928  | 1.16349  |
| H                                 | -1.10893 | -0.77393 | 0.94559  |
| C                                 | -0.7887  | 2.89805  | 2.19399  |
| C                                 | 0.23269  | 1.74803  | 2.30252  |
| H                                 | -0.44897 | 3.56959  | 1.40032  |
| H                                 | 1.25395  | 2.13611  | 2.35471  |
| H                                 | 1.09652  | 0.17883  | 0.91477  |
| H                                 | -2.10794 | 0.46031  | 2.7759   |
| H                                 | -1.38314 | 0.51668  | -0.19979 |
| H                                 | 0.05611  | 1.17472  | 3.23046  |
| H                                 | -0.76304 | 3.47537  | 3.12459  |
| H                                 | -2.86631 | 2.65228  | 2.77079  |
| C                                 | -2.88043 | 3.1441   | 0.71473  |
| C                                 | -4.14736 | 3.73001  | 0.85313  |
| C                                 | -2.24378 | 3.2441   | -0.53439 |
| C                                 | -4.77263 | 4.38635  | -0.20833 |
| H                                 | -4.65684 | 3.68108  | 1.81274  |
| C                                 | -2.85332 | 3.89285  | -1.60811 |
| H                                 | -1.25382 | 2.82005  | -0.67831 |
| C                                 | -4.11263 | 4.45449  | -1.42846 |
| H                                 | -5.75008 | 4.84452  | -0.09849 |
| H                                 | -2.36609 | 3.97041  | -2.57471 |
| F                                 | -4.70339 | 5.08652  | -2.46313 |
| <b><sup>4</sup>TS<sub>H</sub></b> |          |          |          |
| Fe                                | 3.08177  | -0.54453 | -0.33606 |
| O                                 | 2.24425  | -0.16561 | 1.10042  |
| S                                 | 4.14374  | -1.1263  | -2.37663 |

|   |          |          |          |
|---|----------|----------|----------|
| H | 4.6159   | 0.09507  | -2.71256 |
| N | 4.72139  | -1.03718 | 0.70987  |
| C | 6.72325  | -0.9293  | 1.85277  |
| C | 6.28612  | -2.21418 | 1.92994  |
| H | 7.62541  | -0.49582 | 2.26547  |
| H | 6.75354  | -3.0593  | 2.41922  |
| N | 2.48178  | -2.46812 | -0.32157 |
| C | 3.10116  | -3.51028 | 0.31486  |
| C | 2.33047  | -4.7196  | 0.15023  |
| C | 1.23538  | -4.3897  | -0.58727 |
| H | 2.60735  | -5.68502 | 0.55436  |
| H | 0.42514  | -5.02782 | -0.91649 |
| N | 1.44746  | -0.05306 | -1.46034 |
| C | 0.45619  | -0.90234 | -1.87556 |
| C | 1.13773  | 1.17992  | -1.96459 |
| C | -0.51888 | -0.17974 | -2.65865 |
| C | -0.09654 | 1.11448  | -2.71305 |
| H | -1.39814 | -0.62278 | -3.10902 |
| H | -0.55771 | 1.95333  | -3.21893 |
| N | 3.76398  | 1.34611  | -0.53178 |
| C | 3.90115  | 3.60242  | -0.99109 |
| H | 3.61948  | 4.56947  | -1.38839 |
| C | 3.12292  | 2.39615  | -1.14069 |
| C | 5.7401   | -0.20087 | 1.08344  |
| C | 5.03599  | -2.27323 | 1.20664  |
| C | 1.33566  | -2.9785  | -0.8745  |
| C | 1.90345  | 2.3296   | -1.80289 |
| H | 1.5321   | 3.2453   | -2.2533  |
| C | 5.83852  | 1.14458  | 0.76294  |
| H | 6.70667  | 1.68411  | 1.12868  |
| C | 4.28931  | -3.42868 | 1.02917  |
| H | 4.66549  | -4.34204 | 1.47934  |
| C | 0.38989  | -2.26069 | -1.5959  |
| H | -0.46387 | -2.80915 | -1.98158 |
| C | 5.01093  | 3.26886  | -0.27646 |
| H | 5.82876  | 3.90527  | 0.03701  |
| C | 4.91069  | 1.85914  | 0.01492  |
| C | -6.74826 | -1.84635 | -0.10832 |
| C | -6.62653 | -3.22807 | -0.17842 |
| C | -5.48309 | -3.87086 | 0.25774  |
| C | -4.45319 | -3.07133 | 0.77506  |
| C | -4.57974 | -1.6778  | 0.8427   |
| C | -5.74958 | -1.03015 | 0.3942   |
| C | -8.68312 | -2.67898 | -0.84895 |
| H | -5.38408 | -4.94941 | 0.20073  |
| H | -3.53497 | -3.52067 | 1.1377   |
| H | -5.8798  | 0.04354  | 0.43058  |
| H | -9.1256  | -2.65984 | -1.84868 |
| H | -9.46025 | -2.78427 | -0.07743 |
| O | -7.96028 | -1.45964 | -0.62742 |
| O | -7.76026 | -3.76508 | -0.7554  |
| O | -3.50538 | -1.01226 | 1.37439  |



|                                    |          |          |          |
|------------------------------------|----------|----------|----------|
| C                                  | -3.54549 | 0.40832  | 1.44912  |
| H                                  | -3.70985 | 0.83864  | 0.45209  |
| H                                  | -4.37489 | 0.7302   | 2.09715  |
| C                                  | -2.21004 | 0.86845  | 2.02755  |
| C                                  | -1.04446 | 0.48155  | 1.10176  |
| C                                  | -2.19358 | 2.38802  | 2.37484  |
| N                                  | 0.2089   | 1.11489  | 1.45634  |
| H                                  | -0.90514 | -0.61141 | 1.11399  |
| C                                  | -0.80312 | 2.76389  | 2.98292  |
| C                                  | 0.2707   | 1.66734  | 2.78934  |
| H                                  | -0.44336 | 3.69188  | 2.52953  |
| H                                  | 1.27488  | 2.0682   | 2.9526   |
| H                                  | 1.23596  | 0.55811  | 1.10562  |
| H                                  | -2.08452 | 0.33115  | 2.97723  |
| H                                  | -1.26524 | 0.72959  | 0.05333  |
| H                                  | 0.11889  | 0.8658   | 3.53369  |
| H                                  | -0.90103 | 2.95526  | 4.05726  |
| H                                  | -2.95117 | 2.52926  | 3.15506  |
| C                                  | -2.60455 | 3.28659  | 1.21129  |
| C                                  | -3.88728 | 3.8545   | 1.19119  |
| C                                  | -1.74119 | 3.57622  | 0.14088  |
| C                                  | -4.31105 | 4.6745   | 0.1441   |
| H                                  | -4.57042 | 3.66082  | 2.01514  |
| C                                  | -2.14647 | 4.39294  | -0.9147  |
| H                                  | -0.73582 | 3.16459  | 0.12612  |
| C                                  | -3.42888 | 4.92956  | -0.89792 |
| H                                  | -5.30138 | 5.11786  | 0.13227  |
| H                                  | -1.48185 | 4.6207   | -1.74186 |
| F                                  | -3.82278 | 5.72353  | -1.91531 |
| <b><sup>2</sup>INT<sub>H</sub></b> |          |          |          |
| Fe                                 | 3.39154  | -0.50984 | -0.36172 |
| O                                  | 2.53942  | -0.14027 | 1.1411   |
| S                                  | 4.4502   | -1.08284 | -2.3579  |
| H                                  | 5.25216  | 0.00036  | -2.45901 |
| N                                  | 4.60336  | -1.74778 | 0.66883  |
| C                                  | 6.34687  | -2.58827 | 1.91983  |
| C                                  | 5.47459  | -3.6103  | 1.7105   |
| H                                  | 7.28266  | -2.59841 | 2.46411  |
| H                                  | 5.54371  | -4.6377  | 2.0447   |
| N                                  | 2.16728  | -2.05166 | -0.79082 |
| C                                  | 2.29276  | -3.34124 | -0.34122 |
| C                                  | 1.18888  | -4.13607 | -0.81835 |
| C                                  | 0.39565  | -3.3099  | -1.55535 |
| H                                  | 1.05447  | -5.18921 | -0.60663 |
| H                                  | -0.52605 | -3.54356 | -2.07298 |
| N                                  | 2.17089  | 0.73856  | -1.39598 |
| C                                  | 1.02409  | 0.39658  | -2.06599 |
| C                                  | 2.36919  | 2.07617  | -1.61989 |
| C                                  | 0.46819  | 1.55985  | -2.71371 |
| C                                  | 1.30132  | 2.60155  | -2.43574 |
| H                                  | -0.43454 | 1.55814  | -3.31137 |

|   |           |          |          |
|---|-----------|----------|----------|
| H | 1.2298    | 3.63079  | -2.76474 |
| N | 4.6973    | 0.9982   | -0.08715 |
| C | 5.65152   | 3.09559  | -0.01443 |
| H | 5.76528   | 4.15788  | -0.1897  |
| C | 4.53192   | 2.30766  | -0.46734 |
| C | 5.79448   | -1.427   | 1.26124  |
| C | 4.38997   | -3.07745 | 0.9192   |
| C | 1.00933   | -2.00556 | -1.52695 |
| C | 3.45586   | 2.81832  | -1.17837 |
| H | 3.47465   | 3.87538  | -1.42407 |
| C | 6.39977   | -0.17979 | 1.23634  |
| H | 7.34716   | -0.06992 | 1.7542   |
| C | 3.31756   | -3.82617 | 0.46012  |
| H | 3.28321   | -4.87542 | 0.73541  |
| C | 0.47465   | -0.87611 | -2.1314  |
| H | -0.44404  | -0.99816 | -2.69632 |
| C | 6.48409   | 2.25081  | 0.65376  |
| H | 7.42314   | 2.47534  | 1.14345  |
| C | 5.87419   | 0.94447  | 0.61557  |
| C | -7.43062  | -1.44251 | -0.30051 |
| C | -7.51225  | -2.82642 | -0.38417 |
| C | -6.49373  | -3.63501 | 0.08446  |
| C | -5.3751   | -3.00074 | 0.64442  |
| C | -5.29665  | -1.60436 | 0.72702  |
| C | -6.34182  | -0.78719 | 0.2483   |
| C | -9.30134  | -1.96439 | -1.40098 |
| H | -6.55729  | -4.71612 | 0.02529  |
| H | -4.54383  | -3.5837  | 1.02605  |
| H | -6.3138   | 0.29354  | 0.2963   |
| H | -9.21472  | -1.90084 | -2.4959  |
| H | -10.34788 | -1.91438 | -1.08833 |
| O | -8.57693  | -0.87816 | -0.80673 |
| O | -8.72327  | -3.18694 | -0.94162 |
| O | -4.15118  | -1.11009 | 1.29461  |
| C | -4.00384  | 0.29962  | 1.43203  |
| H | -4.06068  | 0.78619  | 0.44881  |
| H | -4.81389  | 0.70517  | 2.05714  |
| C | -2.6487   | 0.55051  | 2.08647  |
| C | -1.49303  | 0.05937  | 1.19189  |
| C | -2.44092  | 2.03705  | 2.50476  |
| N | -0.17115  | 0.49596  | 1.58825  |
| H | -1.48409  | -1.04322 | 1.17056  |
| C | -1.04197  | 2.18312  | 3.18419  |
| C | -0.11357  | 0.9607   | 2.95428  |
| H | -0.54189  | 3.0801   | 2.80769  |
| H | 0.92185   | 1.21364  | 3.19935  |
| H | 1.59144   | 0.11886  | 1.00835  |
| H | -2.64219  | -0.0379  | 3.0136   |
| H | -1.64558  | 0.36092  | 0.14629  |
| H | -0.41888  | 0.14176  | 3.62906  |
| H | -1.15926  | 2.31926  | 4.26516  |
| H | -3.20781  | 2.25558  | 3.25782  |

|                                    |          |          |          |
|------------------------------------|----------|----------|----------|
| C                                  | -2.6635  | 3.02692  | 1.36494  |
| C                                  | -3.85515 | 3.76522  | 1.30713  |
| C                                  | -1.71488 | 3.23125  | 0.34812  |
| C                                  | -4.10899 | 4.67065  | 0.27544  |
| H                                  | -4.60062 | 3.63861  | 2.08909  |
| C                                  | -1.9511  | 4.12935  | -0.69244 |
| H                                  | -0.77272 | 2.69012  | 0.36044  |
| C                                  | -3.14788 | 4.836    | -0.71365 |
| H                                  | -5.02848 | 5.24547  | 0.23501  |
| H                                  | -1.21907 | 4.28118  | -1.47839 |
| F                                  | -3.37917 | 5.70873  | -1.71746 |
| <b><sup>4</sup>INT<sub>H</sub></b> |          |          |          |
| Fe                                 | 3.01895  | -0.43907 | -0.59739 |
| O                                  | 2.1602   | 0.19923  | 0.81517  |
| S                                  | 4.2163   | -1.33401 | -2.37989 |
| H                                  | 3.53423  | -0.74342 | -3.38645 |
| N                                  | 4.40924  | 0.99494  | -0.33567 |
| C                                  | 5.57673  | 2.97878  | -0.44914 |
| C                                  | 6.2715   | 2.15093  | 0.37666  |
| H                                  | 5.81287  | 3.993    | -0.7451  |
| H                                  | 7.19922  | 2.34166  | 0.90101  |
| N                                  | 4.1108   | -1.71136 | 0.51927  |
| C                                  | 5.28556  | -1.4272  | 1.16671  |
| C                                  | 5.72789  | -2.58189 | 1.90863  |
| C                                  | 4.8013   | -3.55918 | 1.70845  |
| H                                  | 6.63124  | -2.61961 | 2.50402  |
| H                                  | 4.78489  | -4.56609 | 2.10579  |
| N                                  | 1.60493  | -1.86999 | -0.84256 |
| C                                  | 1.63084  | -3.14285 | -0.33191 |
| C                                  | 0.46154  | -1.77578 | -1.59406 |
| C                                  | 0.45378  | -3.86405 | -0.75029 |
| C                                  | -0.27253 | -3.01658 | -1.53029 |
| H                                  | 0.23402  | -4.88933 | -0.48086 |
| H                                  | -1.21195 | -3.20107 | -2.03583 |
| N                                  | 2.01403  | 0.76177  | -1.86868 |
| C                                  | 0.38571  | 1.64051  | -3.24328 |
| H                                  | -0.53101 | 1.68907  | -3.81704 |
| C                                  | 0.80601  | 0.50024  | -2.46781 |
| C                                  | 4.41586  | 2.24444  | -0.89537 |
| C                                  | 5.53896  | 0.90773  | 0.43402  |
| C                                  | 3.78703  | -3.00398 | 0.84676  |
| C                                  | 0.07583  | -0.67412 | -2.34517 |
| H                                  | -0.8603  | -0.74104 | -2.89031 |
| C                                  | 3.46813  | 2.74136  | -1.77741 |
| H                                  | 3.60469  | 3.75376  | -2.14395 |
| C                                  | 5.9542   | -0.2113  | 1.13921  |
| H                                  | 6.87781  | -0.13497 | 1.70394  |
| C                                  | 2.64081  | -3.67956 | 0.45281  |
| H                                  | 2.52413  | -4.70519 | 0.78799  |
| C                                  | 1.34372  | 2.5967   | -3.09157 |
| H                                  | 1.37636  | 3.59252  | -3.51506 |

|                                       |           |          |          |
|---------------------------------------|-----------|----------|----------|
| C                                     | 2.35094   | 2.04533  | -2.21857 |
| C                                     | -7.26274  | -0.32199 | -0.65542 |
| C                                     | -7.69129  | -1.59285 | -1.01614 |
| C                                     | -6.99793  | -2.72221 | -0.62285 |
| C                                     | -5.84372  | -2.53123 | 0.15087  |
| C                                     | -5.41412  | -1.24733 | 0.51212  |
| C                                     | -6.13021  | -0.10085 | 0.10903  |
| C                                     | -9.02763  | -0.10458 | -2.00468 |
| H                                     | -7.33332  | -3.71618 | -0.89838 |
| H                                     | -5.25738  | -3.38022 | 0.48548  |
| H                                     | -5.82749  | 0.90455  | 0.37079  |
| H                                     | -8.77169  | 0.10967  | -3.05305 |
| H                                     | -10.05813 | 0.18871  | -1.7866  |
| O                                     | -8.13687  | 0.61906  | -1.14431 |
| O                                     | -8.86195  | -1.4989  | -1.7431  |
| O                                     | -4.27174  | -1.19761 | 1.26696  |
| C                                     | -3.76845  | 0.07342  | 1.67012  |
| H                                     | -3.57518  | 0.70204  | 0.79074  |
| H                                     | -4.50967  | 0.58988  | 2.2987   |
| C                                     | -2.48351  | -0.17624 | 2.45356  |
| C                                     | -1.40835  | -0.83212 | 1.565    |
| C                                     | -1.9279   | 1.10734  | 3.14264  |
| N                                     | -0.07528  | -0.869   | 2.12729  |
| H                                     | -1.69973  | -1.86943 | 1.33048  |
| C                                     | -0.63121  | 0.73691  | 3.929    |
| C                                     | -0.05552  | -0.65755 | 3.55451  |
| H                                     | 0.13961   | 1.49075  | 3.74752  |
| H                                     | 0.97284   | -0.7475  | 3.9171   |
| H                                     | 1.43948   | -0.40084 | 1.1453   |
| H                                     | -2.74522  | -0.87661 | 3.25813  |
| H                                     | -1.3422   | -0.33021 | 0.58959  |
| H                                     | -0.65304  | -1.4414  | 4.05183  |
| H                                     | -0.82863  | 0.73942  | 5.00697  |
| H                                     | -2.68729  | 1.41934  | 3.87001  |
| C                                     | -1.74415  | 2.28138  | 2.183    |
| C                                     | -2.71651  | 3.29222  | 2.13515  |
| C                                     | -0.63436  | 2.39433  | 1.32769  |
| C                                     | -2.60694  | 4.37483  | 1.26105  |
| H                                     | -3.57543  | 3.24042  | 2.80096  |
| C                                     | -0.50848  | 3.46825  | 0.44576  |
| H                                     | 0.15865   | 1.65192  | 1.33854  |
| C                                     | -1.49993  | 4.44163  | 0.42436  |
| H                                     | -3.35576  | 5.15967  | 1.22882  |
| H                                     | 0.34704   | 3.5499   | -0.21636 |
| F                                     | -1.38174  | 5.48565  | -0.42538 |
| <b><sup>2</sup>TS-reb<sub>H</sub></b> |           |          |          |
| Fe                                    | -3.21724  | -0.62417 | 0.04709  |
| O                                     | -1.48259  | -0.08085 | 0.42025  |
| S                                     | -5.34     | -1.40852 | -0.19275 |
| H                                     | -5.34205  | -2.33581 | 0.79011  |
| N                                     | -3.82248  | 0.52629  | 1.61346  |

|   |          |          |          |
|---|----------|----------|----------|
| C | -4.44369 | 1.24841  | 3.71543  |
| C | -4.72769 | 2.25497  | 2.84296  |
| H | -4.59611 | 1.2214   | 4.78694  |
| H | -5.16278 | 3.22437  | 3.05043  |
| N | -3.70284 | 0.8252   | -1.23408 |
| C | -4.2455  | 2.04989  | -0.92021 |
| C | -4.45962 | 2.81683  | -2.12393 |
| C | -4.04155 | 2.045    | -3.16457 |
| H | -4.87822 | 3.81496  | -2.15007 |
| H | -4.04419 | 2.27864  | -4.22172 |
| N | -2.51501 | -1.73142 | -1.46003 |
| C | -2.51385 | -1.40978 | -2.79307 |
| C | -1.99518 | -2.99972 | -1.37037 |
| C | -1.9523  | -2.49198 | -3.56503 |
| C | -1.62917 | -3.47639 | -2.68296 |
| H | -1.8374  | -2.48531 | -4.64155 |
| H | -1.19276 | -4.44649 | -2.88444 |
| N | -2.82011 | -2.13335 | 1.3652   |
| C | -2.08304 | -4.12773 | 2.26072  |
| H | -1.65778 | -5.12295 | 2.28942  |
| C | -2.2493  | -3.33867 | 1.0611   |
| C | -3.88935 | 0.16672  | 2.9392   |
| C | -4.35013 | 1.78943  | 1.53124  |
| C | -3.56495 | 0.80605  | -2.59996 |
| C | -1.86417 | -3.74809 | -0.20968 |
| H | -1.4309  | -4.73911 | -0.30394 |
| C | -3.50371 | -1.06049 | 3.46306  |
| H | -3.60169 | -1.19806 | 4.53547  |
| C | -4.53609 | 2.50792  | 0.35672  |
| H | -4.96385 | 3.50196  | 0.44306  |
| C | -3.00541 | -0.23004 | -3.33509 |
| H | -2.95308 | -0.1112  | -4.41286 |
| C | -2.54873 | -3.37407 | 3.29308  |
| H | -2.58438 | -3.61965 | 4.3469   |
| C | -2.99707 | -2.12299 | 2.72517  |
| C | 6.96198  | -1.83395 | 0.1503   |
| C | 6.8099   | -3.20591 | 0.30131  |
| C | 5.57873  | -3.81334 | 0.13902  |
| C | 4.49255  | -2.9886  | -0.18795 |
| C | 4.65007  | -1.60444 | -0.3402  |
| C | 5.90984  | -0.99323 | -0.16911 |
| C | 8.97875  | -2.72376 | 0.49737  |
| H | 5.45601  | -4.88398 | 0.2619   |
| H | 3.50325  | -3.40934 | -0.33189 |
| H | 6.06676  | 0.07217  | -0.2753  |
| H | 9.63284  | -2.69268 | 1.37298  |
| H | 9.56086  | -2.88693 | -0.42216 |
| O | 8.26897  | -1.4822  | 0.39196  |
| O | 8.02073  | -3.77103 | 0.65335  |
| O | 3.51408  | -0.91331 | -0.66855 |
| C | 3.59296  | 0.49914  | -0.82977 |
| H | 3.96722  | 0.96664  | 0.09111  |

|                                       |          |          |          |
|---------------------------------------|----------|----------|----------|
| H                                     | 4.29257  | 0.74673  | -1.6431  |
| C                                     | 2.19256  | 1.00217  | -1.16406 |
| C                                     | 1.20991  | 0.73749  | 0.0024   |
| C                                     | 2.17309  | 2.50147  | -1.58305 |
| N                                     | -0.02205 | 1.51     | -0.06401 |
| H                                     | 0.94674  | -0.32818 | 0.02195  |
| C                                     | 0.70634  | 2.89582  | -1.94202 |
| C                                     | -0.35224 | 1.88287  | -1.42077 |
| H                                     | 0.48225  | 3.88772  | -1.53907 |
| H                                     | -1.34236 | 2.34217  | -1.43826 |
| H                                     | -1.51575 | 0.44594  | 1.23835  |
| H                                     | 1.85724  | 0.42907  | -2.03784 |
| H                                     | 1.69064  | 0.95533  | 0.96565  |
| H                                     | -0.37899 | 1.00436  | -2.08243 |
| H                                     | 0.58909  | 2.96204  | -3.03    |
| H                                     | 2.77876  | 2.5796   | -2.49442 |
| C                                     | 2.81596  | 3.43389  | -0.55941 |
| C                                     | 4.10447  | 3.93844  | -0.79008 |
| C                                     | 2.16255  | 3.81776  | 0.62449  |
| C                                     | 4.73409  | 4.78853  | 0.12076  |
| H                                     | 4.62735  | 3.67021  | -1.70544 |
| C                                     | 2.77513  | 4.6657   | 1.54732  |
| H                                     | 1.15955  | 3.45188  | 0.82946  |
| C                                     | 4.05521  | 5.13819  | 1.28091  |
| H                                     | 5.72855  | 5.18296  | -0.06108 |
| H                                     | 2.27337  | 4.96405  | 2.46222  |
| F                                     | 4.65079  | 5.9626   | 2.16907  |
| <b><sup>4</sup>TS-reb<sub>H</sub></b> |          |          |          |
| Fe                                    | -2.94563 | -0.45278 | 0.01012  |
| O                                     | -1.5737  | 0.36574  | -0.41903 |
| S                                     | -4.91804 | -1.81728 | 0.39004  |
| H                                     | -5.79986 | -1.07112 | -0.3125  |
| N                                     | -3.12845 | -0.9895  | -1.92707 |
| C                                     | -3.57151 | -0.95138 | -4.19019 |
| C                                     | -2.87841 | -2.09308 | -3.93586 |
| H                                     | -3.95886 | -0.59225 | -5.13528 |
| H                                     | -2.5742  | -2.86739 | -4.62859 |
| N                                     | -1.93325 | -2.15194 | 0.39814  |
| C                                     | -1.58323 | -3.11464 | -0.51105 |
| C                                     | -0.80959 | -4.14875 | 0.13673  |
| C                                     | -0.68762 | -3.78776 | 1.44343  |
| H                                     | -0.42244 | -5.02918 | -0.36033 |
| H                                     | -0.18142 | -4.31062 | 2.24501  |
| N                                     | -2.88499 | 0.02277  | 1.98104  |
| C                                     | -2.24812 | -0.67911 | 2.97671  |
| C                                     | -3.54435 | 1.05765  | 2.60359  |
| C                                     | -2.48184 | -0.0496  | 4.25282  |
| C                                     | -3.28992 | 1.02272  | 4.02262  |
| H                                     | -2.08809 | -0.40633 | 5.1962   |
| H                                     | -3.69215 | 1.7293   | 4.73759  |
| N                                     | -4.14574 | 1.14123  | -0.32406 |

|   |          |          |          |
|---|----------|----------|----------|
| C | -5.36957 | 3.0779   | -0.04774 |
| H | -5.84132 | 3.90776  | 0.46326  |
| C | -4.59203 | 2.0487   | 0.60146  |
| C | -3.7248  | -0.26665 | -2.92583 |
| C | -2.6001  | -2.10546 | -2.51704 |
| C | -1.39467 | -2.53671 | 1.59607  |
| C | -4.3279  | 2.01034  | 1.96537  |
| H | -4.77139 | 2.78627  | 2.58191  |
| C | -4.40743 | 0.92921  | -2.75584 |
| H | -4.83966 | 1.38792  | -3.6399  |
| C | -1.8913  | -3.10365 | -1.86443 |
| H | -1.53709 | -3.93735 | -2.46266 |
| C | -1.52315 | -1.85043 | 2.79781  |
| H | -1.05848 | -2.28921 | 3.67543  |
| C | -5.37624 | 2.78448  | -1.37693 |
| H | -5.85633 | 3.32246  | -2.18464 |
| C | -4.61062 | 1.57104  | -1.53947 |
| C | 5.85976  | -2.42524 | -0.0593  |
| C | 5.46809  | -3.74384 | 0.12846  |
| C | 4.13418  | -4.08493 | 0.25492  |
| C | 3.19346  | -3.04728 | 0.18257  |
| C | 3.59406  | -1.71771 | -0.00719 |
| C | 4.95748  | -1.37792 | -0.13279 |
| C | 7.67722  | -3.7146  | -0.1784  |
| H | 3.82658  | -5.11408 | 0.4062   |
| H | 2.13213  | -3.25462 | 0.27019  |
| H | 5.30098  | -0.36228 | -0.27966 |
| H | 8.50372  | -3.85264 | 0.52408  |
| H | 7.99195  | -3.95187 | -1.20592 |
| O | 7.23168  | -2.35277 | -0.12391 |
| O | 6.58534  | -4.55449 | 0.19766  |
| O | 2.57895  | -0.79935 | -0.066   |
| C | 2.90723  | 0.57274  | -0.24461 |
| H | 3.56268  | 0.91244  | 0.56939  |
| H | 3.45208  | 0.71408  | -1.18882 |
| C | 1.59812  | 1.36051  | -0.2715  |
| C | 0.83299  | 1.23509  | 1.05663  |
| C | 1.78797  | 2.86002  | -0.71674 |
| N | -0.4537  | 1.88791  | 0.95246  |
| H | 0.66801  | 0.18274  | 1.29657  |
| C | 0.72454  | 3.77073  | -0.04542 |
| C | -0.62325 | 3.06727  | 0.12371  |
| H | 1.07681  | 4.09521  | 0.94077  |
| H | -1.3552  | 3.73109  | 0.59846  |
| H | 0.95407  | 0.88054  | -1.01636 |
| H | 1.42229  | 1.67356  | 1.88349  |
| H | -1.03634 | 2.77667  | -0.85313 |
| H | 0.59373  | 4.67976  | -0.6426  |
| H | 1.58884  | 2.87473  | -1.79498 |
| C | 3.18827  | 3.43645  | -0.53353 |
| C | 3.96963  | 3.74787  | -1.6556  |
| C | 3.7382   | 3.68758  | 0.73525  |

|                         |          |          |          |
|-------------------------|----------|----------|----------|
| C                       | 5.25145  | 4.28696  | -1.53185 |
| H                       | 3.56807  | 3.56959  | -2.65032 |
| C                       | 5.01796  | 4.22163  | 0.88261  |
| H                       | 3.16421  | 3.4638   | 1.63069  |
| C                       | 5.75688  | 4.5148   | -0.25859 |
| H                       | 5.85322  | 4.53027  | -2.40137 |
| H                       | 5.4448   | 4.41343  | 1.86167  |
| F                       | 6.99394  | 5.03563  | -0.1236  |
| H                       | -1.57533 | 0.17793  | -1.37067 |
| <b><sup>2</sup>P-OH</b> |          |          |          |
| Fe                      | 2.70718  | -0.69664 | -0.60474 |
| O                       | 1.75615  | 0.06322  | 1.37997  |
| S                       | 3.7713   | -1.56716 | -2.36524 |
| H                       | 4.99787  | -1.66986 | -1.80375 |
| N                       | 3.50289  | -2.00134 | 0.71385  |
| C                       | 4.95151  | -3.07162 | 2.16459  |
| C                       | 3.94564  | -3.94646 | 1.88344  |
| H                       | 5.81132  | -3.21661 | 2.80653  |
| H                       | 3.80909  | -4.95647 | 2.24901  |
| N                       | 1.11868  | -1.91577 | -0.86479 |
| C                       | 0.98635  | -3.19444 | -0.3779  |
| C                       | -0.24015 | -3.78758 | -0.85547 |
| C                       | -0.84731 | -2.85738 | -1.6416  |
| H                       | -0.57668 | -4.7871  | -0.6103  |
| H                       | -1.78849 | -2.93178 | -2.17106 |
| N                       | 1.79027  | 0.6843   | -1.73732 |
| C                       | 0.60202  | 0.56403  | -2.41718 |
| C                       | 2.31592  | 1.89704  | -2.11053 |
| C                       | 0.3633   | 1.73737  | -3.22245 |
| C                       | 1.43015  | 2.56264  | -3.03657 |
| H                       | -0.5068  | 1.88821  | -3.84874 |
| H                       | 1.61971  | 3.5316   | -3.48145 |
| N                       | 4.19188  | 0.58623  | -0.18912 |
| C                       | 5.59237  | 2.42386  | -0.26359 |
| H                       | 5.96009  | 3.39891  | -0.55743 |
| C                       | 4.37695  | 1.82112  | -0.75863 |
| C                       | 4.67424  | -1.86617 | 1.42522  |
| C                       | 3.04846  | -3.27477 | 0.97638  |
| C                       | 0.01219  | -1.69844 | -1.65054 |
| C                       | 3.51594  | 2.43003  | -1.66119 |
| H                       | 3.79827  | 3.4087   | -2.03714 |
| C                       | 5.49005  | -0.74308 | 1.41301  |
| H                       | 6.38596  | -0.76621 | 2.02598  |
| C                       | 1.88106  | -3.83241 | 0.4711   |
| H                       | 1.64408  | -4.84833 | 0.77224  |
| C                       | -0.24147 | -0.538   | -2.36928 |
| H                       | -1.15235 | -0.50051 | -2.95882 |
| C                       | 6.13872  | 1.54071  | 0.61553  |
| H                       | 7.05004  | 1.63747  | 1.19209  |
| C                       | 5.26104  | 0.39524  | 0.65199  |
| C                       | -6.44887 | -1.27293 | -0.1701  |



|                         |          |          |          |
|-------------------------|----------|----------|----------|
| C                       | -6.46135 | -2.65095 | -0.34213 |
| C                       | -5.41711 | -3.43929 | 0.10419  |
| C                       | -4.34505 | -2.7907  | 0.73481  |
| C                       | -4.33798 | -1.40034 | 0.90933  |
| C                       | -5.40842 | -0.60409 | 0.45127  |
| C                       | -8.26177 | -1.80993 | -1.35667 |
| H                       | -5.42608 | -4.51601 | -0.02646 |
| H                       | -3.49198 | -3.35511 | 1.09516  |
| H                       | -5.43481 | 0.47128  | 0.56967  |
| H                       | -8.1489  | -1.67267 | -2.44248 |
| H                       | -9.31767 | -1.82874 | -1.07332 |
| O                       | -7.60731 | -0.7315  | -0.67426 |
| O                       | -7.63802 | -3.03129 | -0.95763 |
| O                       | -3.23901 | -0.89047 | 1.54879  |
| C                       | -3.10656 | 0.52252  | 1.6645   |
| H                       | -3.15924 | 0.99038  | 0.67264  |
| H                       | -3.9221  | 0.93283  | 2.27895  |
| C                       | -1.75728 | 0.80356  | 2.32035  |
| C                       | -0.60616 | 0.20327  | 1.47659  |
| C                       | -1.57137 | 2.30995  | 2.66203  |
| N                       | 0.6576   | 0.91482  | 1.7085   |
| H                       | -0.50035 | -0.86115 | 1.74492  |
| C                       | -0.17515 | 2.52042  | 3.33574  |
| C                       | 0.80628  | 1.36032  | 3.09121  |
| H                       | 0.26852  | 3.44564  | 2.95692  |
| H                       | 1.8373   | 1.69802  | 3.21903  |
| H                       | 1.66074  | -0.7797  | 1.87667  |
| H                       | -1.76522 | 0.27841  | 3.28462  |
| H                       | -0.82721 | 0.24129  | 0.40637  |
| H                       | 0.63707  | 0.53032  | 3.80585  |
| H                       | -0.29832 | 2.64553  | 4.41755  |
| H                       | -2.33566 | 2.53458  | 3.41609  |
| C                       | -1.8421  | 3.26221  | 1.50015  |
| C                       | -2.99377 | 4.06337  | 1.52305  |
| C                       | -0.98094 | 3.37704  | 0.39514  |
| C                       | -3.29307 | 4.94886  | 0.486    |
| H                       | -3.67114 | 4.00315  | 2.37224  |
| C                       | -1.26509 | 4.25452  | -0.65124 |
| H                       | -0.07603 | 2.77749  | 0.35571  |
| C                       | -2.41871 | 5.02766  | -0.59    |
| H                       | -4.18152 | 5.57168  | 0.50642  |
| H                       | -0.6054  | 4.33415  | -1.50867 |
| F                       | -2.69561 | 5.87968  | -1.60154 |
| <b><sup>4</sup>P-OH</b> |          |          |          |
| Fe                      | 2.79552  | -0.75494 | -0.65508 |
| O                       | 1.68981  | 0.44368  | 1.63158  |
| S                       | 3.87326  | -1.99034 | -2.4522  |
| H                       | 4.91961  | -1.1441  | -2.58451 |
| N                       | 3.53077  | -1.86109 | 0.87977  |
| C                       | 4.99144  | -2.76833 | 2.42553  |
| C                       | 3.94319  | -3.63005 | 2.31129  |

|   |          |          |          |
|---|----------|----------|----------|
| H | 5.8696   | -2.85399 | 3.05283  |
| H | 3.78303  | -4.56948 | 2.82497  |
| N | 1.16419  | -1.93051 | -0.67949 |
| C | 0.99082  | -3.12473 | -0.01505 |
| C | -0.25143 | -3.73617 | -0.40685 |
| C | -0.8364  | -2.90065 | -1.31089 |
| H | -0.61844 | -4.68113 | -0.02685 |
| H | -1.78685 | -3.01456 | -1.81571 |
| N | 1.82884  | 0.58408  | -1.81929 |
| C | 0.62209  | 0.40446  | -2.45217 |
| C | 2.32027  | 1.78138  | -2.28121 |
| C | 0.33864  | 1.52309  | -3.31685 |
| C | 1.39353  | 2.37742  | -3.21189 |
| H | -0.55306 | 1.62244  | -3.92246 |
| H | 1.55     | 3.32206  | -3.71729 |
| N | 4.26825  | 0.58021  | -0.37431 |
| C | 5.67371  | 2.39569  | -0.63056 |
| H | 6.03596  | 3.3454   | -1.00315 |
| C | 4.43575  | 1.77888  | -1.02936 |
| C | 4.73295  | -1.67504 | 1.52329  |
| C | 3.04263  | -3.06352 | 1.33949  |
| C | 0.05055  | -1.7795  | -1.47588 |
| C | 3.53717  | 2.34169  | -1.92445 |
| H | 3.80254  | 3.29538  | -2.36952 |
| C | 5.59251  | -0.60568 | 1.32521  |
| H | 6.51022  | -0.58413 | 1.90446  |
| C | 1.86149  | -3.66004 | 0.92411  |
| H | 1.59653  | -4.61472 | 1.36729  |
| C | -0.20951 | -0.69519 | -2.30196 |
| H | -1.13381 | -0.70915 | -2.87066 |
| C | 6.2506   | 1.56682  | 0.2843   |
| H | 7.18398  | 1.69581  | 0.81737  |
| C | 5.36586  | 0.44275  | 0.44483  |
| C | -6.32444 | -1.43725 | -0.3395  |
| C | -6.27176 | -2.81994 | -0.45739 |
| C | -5.22849 | -3.54671 | 0.08531  |
| C | -4.22607 | -2.83083 | 0.75691  |
| C | -4.28392 | -1.43544 | 0.87557  |
| C | -5.35324 | -0.70279 | 0.31877  |
| C | -8.04076 | -2.09363 | -1.60858 |
| H | -5.18768 | -4.62718 | -0.00121 |
| H | -3.37857 | -3.34566 | 1.19588  |
| H | -5.42987 | 0.37412  | 0.39215  |
| H | -7.87659 | -1.99221 | -2.69166 |
| H | -9.10873 | -2.14696 | -1.37957 |
| O | -7.46811 | -0.96341 | -0.93625 |
| O | -7.38998 | -3.27186 | -1.13028 |
| O | -3.24994 | -0.85641 | 1.56177  |
| C | -3.19726 | 0.56447  | 1.64893  |
| H | -3.20511 | 1.00536  | 0.64351  |
| H | -4.07484 | 0.94351  | 2.19402  |
| C | -1.91416 | 0.93504  | 2.38724  |

|   |          |          |          |
|---|----------|----------|----------|
| C | -0.6712  | 0.39012  | 1.64195  |
| C | -1.83448 | 2.4576   | 2.69758  |
| N | 0.51959  | 1.19319  | 1.93385  |
| H | -0.51222 | -0.65799 | 1.95122  |
| C | -0.51353 | 2.75336  | 3.48233  |
| C | 0.55609  | 1.65686  | 3.31598  |
| H | -0.10199 | 3.70725  | 3.13988  |
| H | 1.55361  | 2.06248  | 3.50107  |
| H | 1.63668  | -0.40872 | 2.11839  |
| H | -1.95943 | 0.43346  | 3.36306  |
| H | -0.82199 | 0.38342  | 0.55801  |
| H | 0.39833  | 0.8248   | 4.03179  |
| H | -0.73407 | 2.86589  | 4.55012  |
| H | -2.66998 | 2.66393  | 3.37784  |
| C | -2.05484 | 3.36018  | 1.48501  |
| C | -3.24753 | 4.09254  | 1.38322  |
| C | -1.11278 | 3.48979  | 0.44951  |
| C | -3.50939 | 4.92248  | 0.29139  |
| H | -3.98951 | 4.0212   | 2.17568  |
| C | -1.35875 | 4.31099  | -0.65075 |
| H | -0.17709 | 2.94209  | 0.51122  |
| C | -2.55565 | 5.01529  | -0.7138  |
| H | -4.43011 | 5.49191  | 0.21576  |
| H | -0.63666 | 4.40118  | -1.45579 |
| F | -2.79636 | 5.81252  | -1.77809 |

### Secondary amine hydroxylation by OAR mechanism

#### <sup>2</sup>TS<sub>o</sub>

|    |          |          |          |
|----|----------|----------|----------|
| Fe | -2.94563 | -0.45278 | 0.01012  |
| O  | -1.5737  | 0.36574  | -0.41903 |
| S  | -4.91804 | -1.81728 | 0.39004  |
| H  | -5.79986 | -1.07112 | -0.3125  |
| N  | -3.12845 | -0.9895  | -1.92707 |
| C  | -3.57151 | -0.95138 | -4.19019 |
| C  | -2.87841 | -2.09308 | -3.93586 |
| H  | -3.95886 | -0.59225 | -5.13528 |
| H  | -2.5742  | -2.86739 | -4.62859 |
| N  | -1.93325 | -2.15194 | 0.39814  |
| C  | -1.58323 | -3.11464 | -0.51105 |
| C  | -0.80959 | -4.14875 | 0.13673  |
| C  | -0.68762 | -3.78776 | 1.44343  |
| H  | -0.42244 | -5.02918 | -0.36033 |
| H  | -0.18142 | -4.31062 | 2.24501  |
| N  | -2.88499 | 0.02277  | 1.98104  |
| C  | -2.24812 | -0.67911 | 2.97671  |
| C  | -3.54435 | 1.05765  | 2.60359  |
| C  | -2.48184 | -0.0496  | 4.25282  |
| C  | -3.28992 | 1.02272  | 4.02262  |
| H  | -2.08809 | -0.40633 | 5.1962   |
| H  | -3.69215 | 1.7293   | 4.73759  |
| N  | -4.14574 | 1.14123  | -0.32406 |
| C  | -5.36957 | 3.0779   | -0.04774 |

|   |          |          |          |
|---|----------|----------|----------|
| H | -5.84132 | 3.90776  | 0.46326  |
| C | -4.59203 | 2.0487   | 0.60146  |
| C | -3.7248  | -0.26665 | -2.92583 |
| C | -2.6001  | -2.10546 | -2.51704 |
| C | -1.39467 | -2.53671 | 1.59607  |
| C | -4.3279  | 2.01034  | 1.96537  |
| H | -4.77139 | 2.78627  | 2.58191  |
| C | -4.40743 | 0.92921  | -2.75584 |
| H | -4.83966 | 1.38792  | -3.6399  |
| C | -1.8913  | -3.10365 | -1.86443 |
| H | -1.53709 | -3.93735 | -2.46266 |
| C | -1.52315 | -1.85043 | 2.79781  |
| H | -1.05848 | -2.28921 | 3.67543  |
| C | -5.37624 | 2.78448  | -1.37693 |
| H | -5.85633 | 3.32246  | -2.18464 |
| C | -4.61062 | 1.57104  | -1.53947 |
| C | 5.85976  | -2.42524 | -0.0593  |
| C | 5.46809  | -3.74384 | 0.12846  |
| C | 4.13418  | -4.08493 | 0.25492  |
| C | 3.19346  | -3.04728 | 0.18257  |
| C | 3.59406  | -1.71771 | -0.00719 |
| C | 4.95748  | -1.37792 | -0.13279 |
| C | 7.67722  | -3.7146  | -0.1784  |
| H | 3.82658  | -5.11408 | 0.4062   |
| H | 2.13213  | -3.25462 | 0.27019  |
| H | 5.30098  | -0.36228 | -0.27966 |
| H | 8.50372  | -3.85264 | 0.52408  |
| H | 7.99195  | -3.95187 | -1.20592 |
| O | 7.23168  | -2.35277 | -0.12391 |
| O | 6.58534  | -4.55449 | 0.19766  |
| O | 2.57895  | -0.79935 | -0.066   |
| C | 2.90723  | 0.57274  | -0.24461 |
| H | 3.56268  | 0.91244  | 0.56939  |
| H | 3.45208  | 0.71408  | -1.18882 |
| C | 1.59812  | 1.36051  | -0.2715  |
| C | 0.83299  | 1.23509  | 1.05663  |
| C | 1.78797  | 2.86002  | -0.71674 |
| N | -0.4537  | 1.88791  | 0.95246  |
| H | 0.66801  | 0.18274  | 1.29657  |
| C | 0.72454  | 3.77073  | -0.04542 |
| C | -0.62325 | 3.06727  | 0.12371  |
| H | 1.07681  | 4.09521  | 0.94077  |
| H | -1.3552  | 3.73109  | 0.59846  |
| H | 0.95407  | 0.88054  | -1.01636 |
| H | 1.42229  | 1.67356  | 1.88349  |
| H | -1.03634 | 2.77667  | -0.85313 |
| H | 0.59373  | 4.67976  | -0.6426  |
| H | 1.58884  | 2.87473  | -1.79498 |
| C | 3.18827  | 3.43645  | -0.53353 |
| C | 3.96963  | 3.74787  | -1.6556  |
| C | 3.7382   | 3.68758  | 0.73525  |
| C | 5.25145  | 4.28696  | -1.53185 |

|                                   |          |          |          |
|-----------------------------------|----------|----------|----------|
| H                                 | 3.56807  | 3.56959  | -2.65032 |
| C                                 | 5.01796  | 4.22163  | 0.88261  |
| H                                 | 3.16421  | 3.4638   | 1.63069  |
| C                                 | 5.75688  | 4.5148   | -0.25859 |
| H                                 | 5.85322  | 4.53027  | -2.40137 |
| H                                 | 5.4448   | 4.41343  | 1.86167  |
| F                                 | 6.99394  | 5.03563  | -0.1236  |
| H                                 | -1.248   | 1.49949  | 1.44633  |
| <b><sup>4</sup>TS<sub>0</sub></b> |          |          |          |
| Fe                                | -2.8885  | -0.48012 | -0.18581 |
| O                                 | -1.53077 | 0.3653   | -0.49699 |
| S                                 | -4.91945 | -1.84238 | 0.54484  |
| H                                 | -5.7413  | -0.81107 | 0.84536  |
| N                                 | -3.03857 | -1.13611 | -2.08487 |
| C                                 | -3.45499 | -1.23376 | -4.35495 |
| C                                 | -2.71593 | -2.33024 | -4.03509 |
| H                                 | -3.84272 | -0.93779 | -5.32128 |
| H                                 | -2.36883 | -3.12463 | -4.68327 |
| N                                 | -1.91083 | -2.17402 | 0.31888  |
| C                                 | -1.49551 | -3.167   | -0.5331  |
| C                                 | -0.75394 | -4.17184 | 0.1909   |
| C                                 | -0.71947 | -3.77048 | 1.49029  |
| H                                 | -0.32586 | -5.06104 | -0.2536  |
| H                                 | -0.26204 | -4.26363 | 2.33848  |
| N                                 | -2.98045 | 0.02473  | 1.77174  |
| C                                 | -2.3678  | -0.6199  | 2.82233  |
| C                                 | -3.56146 | 1.15153  | 2.30817  |
| C                                 | -2.58804 | 0.10609  | 4.04954  |
| C                                 | -3.32856 | 1.20395  | 3.73112  |
| H                                 | -2.22476 | -0.20398 | 5.0212   |
| H                                 | -3.6966  | 1.98274  | 4.38707  |
| N                                 | -4.09649 | 1.07449  | -0.62784 |
| C                                 | -5.2651  | 3.06352  | -0.50081 |
| H                                 | -5.70561 | 3.94602  | -0.05469 |
| C                                 | -4.51038 | 2.06653  | 0.22014  |
| C                                 | -3.64919 | -0.49578 | -3.12893 |
| C                                 | -2.46306 | -2.25678 | -2.61514 |
| C                                 | -1.44219 | -2.52222 | 1.55801  |
| C                                 | -4.26285 | 2.10691  | 1.58901  |
| H                                 | -4.65974 | 2.95359  | 2.14102  |
| C                                 | -4.3646  | 0.6914   | -3.03379 |
| H                                 | -4.7989  | 1.08515  | -3.94782 |
| C                                 | -1.74758 | -3.20897 | -1.89633 |
| H                                 | -1.35267 | -4.05584 | -2.4492  |
| C                                 | -1.64045 | -1.79527 | 2.72513  |
| H                                 | -1.20695 | -2.19117 | 3.63841  |
| C                                 | -5.30041 | 2.6606   | -1.80026 |
| H                                 | -5.77529 | 3.14357  | -2.64468 |
| C                                 | -4.56465 | 1.42092  | -1.86911 |
| C                                 | 5.8126   | -2.35991 | -0.1013  |
| C                                 | 5.49594  | -3.67172 | 0.22417  |

|                         |          |          |          |
|-------------------------|----------|----------|----------|
| C                       | 4.23537  | -4.0125  | 0.67835  |
| C                       | 3.29259  | -2.9811  | 0.796    |
| C                       | 3.61687  | -1.65556 | 0.47105  |
| C                       | 4.90653  | -1.31908 | 0.00608  |
| C                       | 7.562    | -3.64638 | -0.61371 |
| H                       | 3.98542  | -5.03672 | 0.93422  |
| H                       | 2.28238  | -3.1899  | 1.13143  |
| H                       | 5.19036  | -0.30902 | -0.25828 |
| H                       | 8.539    | -3.75628 | -0.13505 |
| H                       | 7.61416  | -3.921   | -1.67848 |
| O                       | 7.12833  | -2.28553 | -0.49805 |
| O                       | 6.60856  | -4.47527 | 0.05144  |
| O                       | 2.61153  | -0.74531 | 0.63449  |
| C                       | 2.85138  | 0.61532  | 0.27332  |
| H                       | 3.70751  | 1.00435  | 0.84151  |
| H                       | 3.10508  | 0.67618  | -0.79413 |
| C                       | 1.57986  | 1.40601  | 0.57155  |
| C                       | 1.26493  | 1.4455   | 2.07822  |
| C                       | 1.58318  | 2.8479   | -0.06657 |
| N                       | -0.0107  | 2.08024  | 2.29406  |
| H                       | 1.22373  | 0.41879  | 2.45734  |
| C                       | 0.79983  | 3.84678  | 0.82638  |
| C                       | -0.42604 | 3.20586  | 1.48334  |
| H                       | 1.45516  | 4.2317   | 1.61722  |
| H                       | -0.9321  | 3.95557  | 2.10946  |
| H                       | 0.74782  | 0.86367  | 0.10908  |
| H                       | 2.10251  | 1.94277  | 2.61477  |
| H                       | -1.14566 | 2.90537  | 0.70179  |
| H                       | 0.49721  | 4.7099   | 0.22153  |
| H                       | 1.02628  | 2.75488  | -1.00679 |
| C                       | 2.95214  | 3.41184  | -0.43146 |
| C                       | 3.29646  | 3.61029  | -1.77652 |
| C                       | 3.90197  | 3.76564  | 0.54275  |
| C                       | 4.53462  | 4.1373   | -2.14974 |
| H                       | 2.57979  | 3.3499   | -2.55184 |
| C                       | 5.14645  | 4.28937  | 0.19296  |
| H                       | 3.67234  | 3.63033  | 1.59637  |
| C                       | 5.44327  | 4.46887  | -1.15366 |
| H                       | 4.79735  | 4.29226  | -3.19123 |
| H                       | 5.88127  | 4.56004  | 0.94441  |
| F                       | 6.64519  | 4.98017  | -1.4995  |
| H                       | -0.568   | 1.8143   | 3.08832  |
| <b><sup>2</sup>INTo</b> |          |          |          |
| Fe                      | 2.949    | -0.51757 | -0.27115 |
| O                       | 1.44778  | 0.24144  | 0.78667  |
| S                       | 4.70023  | -1.42819 | -1.40291 |
| H                       | 4.95815  | -2.45564 | -0.56228 |
| N                       | 2.05168  | -2.3095  | -0.08857 |
| C                       | 1.3681   | -4.38041 | 0.67117  |
| C                       | 0.75039  | -4.16649 | -0.52222 |
| H                       | 1.29592  | -5.24091 | 1.32441  |

|   |          |          |          |
|---|----------|----------|----------|
| H | 0.07008  | -4.81747 | -1.05717 |
| N | 1.99289  | -0.16482 | -2.03707 |
| C | 1.1623   | -1.05201 | -2.67726 |
| C | 0.74829  | -0.51261 | -3.95109 |
| C | 1.34854  | 0.70365  | -4.08086 |
| H | 0.09228  | -1.01679 | -4.64977 |
| H | 1.28755  | 1.40082  | -4.90732 |
| N | 3.77609  | 1.33211  | -0.43905 |
| C | 3.67578  | 2.22565  | -1.47802 |
| C | 4.64766  | 1.88924  | 0.46299  |
| C | 4.48671  | 3.39066  | -1.21272 |
| C | 5.0897   | 3.18124  | -0.00898 |
| H | 4.58273  | 4.24128  | -1.876   |
| H | 5.78221  | 3.82613  | 0.51765  |
| N | 3.84622  | -0.81951 | 1.50105  |
| C | 5.15535  | -0.51132 | 3.37738  |
| H | 5.83734  | -0.021   | 4.06081  |
| C | 4.69433  | 0.05327  | 2.12656  |
| C | 2.17915  | -3.21205 | 0.9328   |
| C | 1.18593  | -2.86716 | -0.98959 |
| C | 2.13144  | 0.90972  | -2.8859  |
| C | 5.06572  | 1.30736  | 1.65439  |
| H | 5.75839  | 1.87906  | 2.26527  |
| C | 2.97519  | -3.03885 | 2.05863  |
| H | 2.98967  | -3.83908 | 2.79237  |
| C | 0.77019  | -2.29254 | -2.18634 |
| H | 0.09045  | -2.87398 | -2.80231 |
| C | 2.9028   | 2.03903  | -2.62206 |
| H | 2.91746  | 2.82408  | -3.37209 |
| C | 4.5701   | -1.73329 | 3.49475  |
| H | 4.66947  | -2.4561  | 4.29483  |
| C | 3.75069  | -1.91465 | 2.31653  |
| C | -5.98426 | -2.30382 | 0.12153  |
| C | -5.65081 | -3.64472 | -0.01752 |
| C | -4.34086 | -4.07413 | 0.08867  |
| C | -3.36178 | -3.10133 | 0.33818  |
| C | -3.70472 | -1.75036 | 0.47757  |
| C | -5.04313 | -1.31984 | 0.37203  |
| C | -7.83328 | -3.4272  | -0.42576 |
| H | -4.07976 | -5.12177 | -0.01466 |
| H | -2.31559 | -3.37654 | 0.42409  |
| H | -5.34035 | -0.28452 | 0.47841  |
| H | -8.09045 | -3.37728 | -1.49442 |
| H | -8.7063  | -3.69912 | 0.17367  |
| O | -7.34464 | -2.14808 | 0.00204  |
| O | -6.79652 | -4.38818 | -0.22372 |
| O | -2.65568 | -0.90027 | 0.71963  |
| C | -2.90565 | 0.49232  | 0.83116  |
| H | -3.39985 | 0.86848  | -0.0752  |
| H | -3.57042 | 0.69963  | 1.68203  |
| C | -1.55127 | 1.16926  | 1.04845  |
| C | -0.6286  | 0.95747  | -0.14843 |

|                         |          |          |          |
|-------------------------|----------|----------|----------|
| C                       | -1.65533 | 2.68894  | 1.43565  |
| N                       | 0.79109  | 1.32752  | 0.21975  |
| H                       | -0.58252 | -0.08677 | -0.4504  |
| C                       | -0.34531 | 3.41618  | 1.02623  |
| C                       | 0.86879  | 2.50428  | 1.16819  |
| H                       | -0.41042 | 3.78664  | -0.00388 |
| H                       | 1.81585  | 3.00711  | 0.96532  |
| H                       | -1.0815  | 0.64174  | 1.88706  |
| H                       | -0.92248 | 1.56937  | -1.00874 |
| H                       | 0.92758  | 2.05106  | 2.15931  |
| H                       | -0.20145 | 4.30279  | 1.65317  |
| H                       | -1.70957 | 2.71664  | 2.53068  |
| C                       | -2.89528 | 3.41429  | 0.92515  |
| C                       | -3.90385 | 3.78577  | 1.82675  |
| C                       | -3.08136 | 3.73363  | -0.4306  |
| C                       | -5.05882 | 4.44636  | 1.40582  |
| H                       | -3.78456 | 3.55857  | 2.88344  |
| C                       | -4.2291  | 4.39029  | -0.87378 |
| H                       | -2.32406 | 3.47255  | -1.16482 |
| C                       | -5.20364 | 4.73763  | 0.05543  |
| H                       | -5.83572 | 4.73632  | 2.1055   |
| H                       | -4.37428 | 4.63617  | -1.92057 |
| F                       | -6.31321 | 5.37623  | -0.36557 |
| H                       | 1.28151  | 1.56961  | -0.65071 |
| <b><sup>4</sup>INTo</b> |          |          |          |
| Fe                      | -2.98045 | -0.52618 | 0.24539  |
| O                       | -1.42203 | 0.14414  | -0.84159 |
| S                       | -4.78683 | -1.36868 | 1.43228  |
| H                       | -5.12131 | -2.35748 | 0.57317  |
| N                       | -1.64664 | -1.79659 | 1.2766   |
| C                       | -0.44087 | -3.65728 | 1.86777  |
| C                       | -0.31694 | -2.75399 | 2.88317  |
| H                       | -0.01356 | -4.65068 | 1.80541  |
| H                       | 0.23626  | -2.86355 | 3.80793  |
| N                       | -2.70966 | 0.90724  | 1.74419  |
| C                       | -2.0568  | 0.69387  | 2.94497  |
| C                       | -2.31815 | 1.81044  | 3.82243  |
| C                       | -3.15508 | 2.66435  | 3.15931  |
| H                       | -1.92667 | 1.91207  | 4.82729  |
| H                       | -3.57524 | 3.59533  | 3.5199   |
| N                       | -4.2262  | 0.84036  | -0.77393 |
| C                       | -4.6555  | 2.0529   | -0.32789 |
| C                       | -4.84712 | 0.58281  | -1.96053 |
| C                       | -5.58287 | 2.6169   | -1.29386 |
| C                       | -5.69957 | 1.70776  | -2.30458 |
| H                       | -6.08099 | 3.57403  | -1.19803 |
| H                       | -6.31357 | 1.77683  | -3.19427 |
| N                       | -3.19474 | -1.88903 | -1.23816 |
| C                       | -3.81577 | -2.92217 | -3.18787 |
| H                       | -4.30198 | -3.07357 | -4.14369 |
| C                       | -3.94358 | -1.7299  | -2.37087 |



|   |          |          |          |
|---|----------|----------|----------|
| C | -1.29324 | -3.04677 | 0.86188  |
| C | -1.09089 | -1.58546 | 2.50136  |
| C | -3.42143 | 2.0871   | 1.86299  |
| C | -4.703   | -0.59795 | -2.69995 |
| H | -5.25427 | -0.65094 | -3.63518 |
| C | -1.72    | -3.64461 | -0.33063 |
| H | -1.34375 | -4.64463 | -0.53004 |
| C | -1.27874 | -0.42558 | 3.2677   |
| H | -0.8066  | -0.41003 | 4.24657  |
| C | -4.27346 | 2.63041  | 0.89221  |
| H | -4.72654 | 3.58711  | 1.13882  |
| C | -2.98189 | -3.77371 | -2.5254  |
| H | -2.65167 | -4.75816 | -2.83316 |
| C | -2.58884 | -3.11332 | -1.29462 |
| C | 6.15566  | -2.20145 | -0.18186 |
| C | 5.86648  | -3.54686 | 0.00423  |
| C | 4.56871  | -4.0188  | -0.06302 |
| C | 3.55634  | -3.08393 | -0.32411 |
| C | 3.85421  | -1.72861 | -0.51345 |
| C | 5.18046  | -1.25473 | -0.44475 |
| C | 8.0492   | -3.2511  | 0.36176  |
| H | 4.34145  | -5.06955 | 0.08036  |
| H | 2.51742  | -3.39158 | -0.37588 |
| H | 5.44383  | -0.21481 | -0.58798 |
| H | 8.32924  | -3.16151 | 1.42197  |
| H | 8.91621  | -3.51489 | -0.25005 |
| O | 7.51234  | -2.00049 | -0.09171 |
| O | 7.03783  | -4.24831 | 0.21286  |
| O | 2.77632  | -0.91892 | -0.76843 |
| C | 2.98024  | 0.4818   | -0.87303 |
| H | 3.45721  | 0.86718  | 0.03846  |
| H | 3.64337  | 0.71495  | -1.71856 |
| C | 1.6098   | 1.12247  | -1.09756 |
| C | 0.67228  | 0.85797  | 0.07786  |
| C | 1.68511  | 2.65412  | -1.4467  |
| N | -0.7478  | 1.22657  | -0.28404 |
| H | 0.63429  | -0.19665 | 0.34352  |
| C | 0.35139  | 3.3433   | -1.04823 |
| C | -0.83682 | 2.40446  | -1.22417 |
| H | 0.3905   | 3.69695  | -0.01081 |
| H | -1.79952 | 2.88213  | -1.03396 |
| H | 1.16927  | 0.60559  | -1.95864 |
| H | 0.95264  | 1.44185  | 0.96198  |
| H | -0.86699 | 1.96162  | -2.22171 |
| H | 0.19784  | 4.23718  | -1.66236 |
| H | 1.76125  | 2.70828  | -2.53943 |
| C | 2.89611  | 3.39768  | -0.89405 |
| C | 3.91054  | 3.82087  | -1.76573 |
| C | 3.04715  | 3.68697  | 0.47283  |
| C | 5.03759  | 4.50324  | -1.30538 |
| H | 3.81797  | 3.61802  | -2.83004 |
| C | 4.16661  | 4.36429  | 0.95518  |

|                                       |          |          |          |
|---------------------------------------|----------|----------|----------|
| H                                     | 2.28378  | 3.38525  | 1.18478  |
| C                                     | 5.14804  | 4.76364  | 0.0545   |
| H                                     | 5.81884  | 4.83347  | -1.98199 |
| H                                     | 4.28458  | 4.58699  | 2.01056  |
| F                                     | 6.2302   | 5.423    | 0.51345  |
| H                                     | -1.25679 | 1.44776  | 0.59413  |
| <b><sup>2</sup>TS-reb<sub>0</sub></b> |          |          |          |
| Fe                                    | -2.71531 | -0.67545 | 0.52989  |
| O                                     | -1.86507 | -0.07509 | -1.35398 |
| S                                     | -3.82985 | -1.23922 | 2.39507  |
| H                                     | -4.75328 | -2.04746 | 1.8268   |
| N                                     | -2.48019 | -2.57767 | -0.04523 |
| C                                     | -2.80776 | -4.67818 | -0.95091 |
| C                                     | -1.64341 | -4.72102 | -0.24861 |
| H                                     | -3.28661 | -5.46921 | -1.51419 |
| H                                     | -0.96735 | -5.55578 | -0.11276 |
| N                                     | -0.9709  | -0.71358 | 1.54389  |
| C                                     | -0.16111 | -1.8104  | 1.69742  |
| C                                     | 0.95724  | -1.49072 | 2.55327  |
| C                                     | 0.80434  | -0.19195 | 2.93109  |
| H                                     | 1.74475  | -2.18316 | 2.82233  |
| H                                     | 1.43946  | 0.40286  | 3.57542  |
| N                                     | -2.83875 | 1.31596  | 0.94588  |
| C                                     | -2.04617 | 2.05107  | 1.80171  |
| C                                     | -3.89239 | 2.13803  | 0.6045   |
| C                                     | -2.58919 | 3.37411  | 1.96636  |
| C                                     | -3.73038 | 3.42914  | 1.22115  |
| H                                     | -2.15451 | 4.14728  | 2.58771  |
| H                                     | -4.41835 | 4.25733  | 1.10608  |
| N                                     | -4.40865 | -0.58764 | -0.55831 |
| C                                     | -6.34905 | 0.18508  | -1.54614 |
| H                                     | -7.13064 | 0.88173  | -1.82235 |
| C                                     | -5.20769 | 0.51429  | -0.72117 |
| C                                     | -3.3242  | -3.3363  | -0.81654 |
| C                                     | -1.45003 | -3.40647 | 0.31941  |
| C                                     | -0.40282 | 0.28494  | 2.29839  |
| C                                     | -4.97423 | 1.77662  | -0.1886  |
| H                                     | -5.71679 | 2.54311  | -0.38988 |
| C                                     | -4.50937 | -2.88964 | -1.38534 |
| H                                     | -5.08416 | -3.59871 | -1.9732  |
| C                                     | -0.37037 | -3.05626 | 1.12003  |
| H                                     | 0.36571  | -3.82751 | 1.32595  |
| C                                     | -0.89993 | 1.57639  | 2.42713  |
| H                                     | -0.35944 | 2.25982  | 3.07491  |
| C                                     | -6.22539 | -1.12724 | -1.88142 |
| H                                     | -6.88231 | -1.73367 | -2.4922  |
| C                                     | -5.00693 | -1.5988  | -1.26421 |
| C                                     | 6.40637  | -1.50616 | 0.02942  |
| C                                     | 6.37737  | -2.89083 | 0.13153  |
| C                                     | 5.27819  | -3.61843 | -0.28497 |
| C                                     | 4.19564  | -2.90167 | -0.81587 |

|                                       |          |          |          |
|---------------------------------------|----------|----------|----------|
| C                                     | 4.22915  | -1.50477 | -0.91659 |
| C                                     | 5.35439  | -0.77038 | -0.48824 |
| C                                     | 8.39406  | -2.19037 | 0.78174  |
| H                                     | 5.25165  | -4.69956 | -0.20227 |
| H                                     | 3.30717  | -3.41849 | -1.16224 |
| H                                     | 5.41246  | 0.30846  | -0.55005 |
| H                                     | 8.83702  | -2.11867 | 1.77888  |
| H                                     | 9.17449  | -2.26142 | 0.00958  |
| O                                     | 7.59095  | -1.02743 | 0.53537  |
| O                                     | 7.54559  | -3.33751 | 0.71704  |
| O                                     | 3.11283  | -0.92523 | -1.46183 |
| C                                     | 3.04635  | 0.49327  | -1.54105 |
| H                                     | 3.19042  | 0.93824  | -0.54759 |
| H                                     | 3.84012  | 0.87419  | -2.20161 |
| C                                     | 1.67361  | 0.85524  | -2.10516 |
| C                                     | 0.5627   | 0.37138  | -1.15171 |
| C                                     | 1.55883  | 2.36418  | -2.4708  |
| N                                     | -0.75158 | 0.95423  | -1.50367 |
| H                                     | 0.46717  | -0.71519 | -1.20993 |
| C                                     | 0.12922  | 2.6519   | -3.03975 |
| C                                     | -0.85298 | 1.48331  | -2.86569 |
| H                                     | -0.28526 | 3.54151  | -2.55629 |
| H                                     | -1.88355 | 1.81191  | -3.01251 |
| H                                     | -1.73936 | 1.0181   | -0.80161 |
| H                                     | 1.5739   | 0.30081  | -3.04711 |
| H                                     | 0.78766  | 0.63634  | -0.11647 |
| H                                     | -0.66366 | 0.66591  | -3.57473 |
| H                                     | 0.19112  | 2.87919  | -4.10967 |
| H                                     | 2.28033  | 2.52938  | -3.27977 |
| C                                     | 1.96164  | 3.30751  | -1.34103 |
| C                                     | 3.20948  | 3.94782  | -1.38172 |
| C                                     | 1.12707  | 3.56521  | -0.24091 |
| C                                     | 3.62628  | 4.80804  | -0.36467 |
| H                                     | 3.86961  | 3.77944  | -2.22962 |
| C                                     | 1.52524  | 4.42166  | 0.78522  |
| H                                     | 0.14859  | 3.09941  | -0.17663 |
| C                                     | 2.77276  | 5.02998  | 0.70854  |
| H                                     | 4.58911  | 5.30727  | -0.39928 |
| H                                     | 0.87987  | 4.62243  | 1.63396  |
| F                                     | 3.16076  | 5.86208  | 1.69735  |
| <b><sup>4</sup>TS-reb<sub>o</sub></b> |          |          |          |
| Fe                                    | 2.66993  | -0.7113  | -0.54679 |
| O                                     | 1.9118   | 0.01064  | 1.41576  |
| S                                     | 3.71653  | -1.31062 | -2.51269 |
| H                                     | 4.96762  | -1.45091 | -2.01883 |
| N                                     | 2.30489  | -2.66198 | 0.12334  |
| C                                     | 2.59179  | -4.74765 | 1.04126  |
| C                                     | 1.39552  | -4.75453 | 0.38546  |
| H                                     | 3.05604  | -5.55733 | 1.59064  |
| H                                     | 0.69084  | -5.57158 | 0.29172  |
| N                                     | 0.88702  | -0.69762 | -1.5186  |

|   |          |          |          |
|---|----------|----------|----------|
| C | 0.02932  | -1.76598 | -1.62467 |
| C | -1.0816  | -1.39939 | -2.47566 |
| C | -0.87038 | -0.11592 | -2.8834  |
| H | -1.91119 | -2.05087 | -2.7196  |
| H | -1.49375 | 0.49256  | -3.52661 |
| N | 2.81821  | 1.40189  | -0.91443 |
| C | 2.05425  | 2.11285  | -1.80137 |
| C | 3.92392  | 2.15936  | -0.62689 |
| C | 2.66234  | 3.40439  | -2.03064 |
| C | 3.81781  | 3.43472  | -1.29971 |
| H | 2.27126  | 4.17242  | -2.6868  |
| H | 4.54871  | 4.23209  | -1.24455 |
| N | 4.3966   | -0.66079 | 0.48608  |
| C | 6.37064  | 0.0358   | 1.43022  |
| H | 7.18377  | 0.69682  | 1.70314  |
| C | 5.22527  | 0.42424  | 0.63391  |
| C | 3.15957  | -3.42463 | 0.86266  |
| C | 1.23188  | -3.43714 | -0.19971 |
| C | 0.36718  | 0.32567  | -2.27768 |
| C | 5.01398  | 1.71069  | 0.12627  |
| H | 5.80668  | 2.43083  | 0.31033  |
| C | 4.39439  | -2.98017 | 1.34246  |
| H | 4.97974  | -3.68871 | 1.92182  |
| C | 0.17288  | -3.01328 | -1.00718 |
| H | -0.6179  | -3.73337 | -1.19804 |
| C | 0.90045  | 1.6122   | -2.41291 |
| H | 0.36731  | 2.28312  | -3.0808  |
| C | 6.20465  | -1.27554 | 1.76074  |
| H | 6.85406  | -1.90216 | 2.35923  |
| C | 4.9537   | -1.70892 | 1.17434  |
| C | -6.28406 | -1.52251 | -0.05778 |
| C | -6.20411 | -2.90018 | -0.21447 |
| C | -5.08862 | -3.60586 | 0.19635  |
| C | -4.04257 | -2.87426 | 0.77801  |
| C | -4.12746 | -1.48443 | 0.93367  |
| C | -5.2694  | -0.7726  | 0.51143  |
| C | -8.23123 | -2.24417 | -0.87758 |
| H | -5.02243 | -4.68119 | 0.07106  |
| H | -3.14272 | -3.37318 | 1.12135  |
| H | -5.36708 | 0.29999  | 0.61716  |
| H | -8.65913 | -2.14746 | -1.87914 |
| H | -9.02181 | -2.37385 | -0.12354 |
| O | -7.47447 | -1.06493 | -0.56974 |
| O | -7.34356 | -3.36252 | -0.8431  |
| O | -3.04454 | -0.88966 | 1.52661  |
| C | -3.00087 | 0.52983  | 1.61102  |
| H | -3.15119 | 0.97447  | 0.61848  |
| H | -3.80079 | 0.89657  | 2.2723   |
| C | -1.63293 | 0.91041  | 2.17505  |
| C | -0.51836 | 0.42306  | 1.22857  |
| C | -1.52959 | 2.42492  | 2.51989  |
| N | 0.79249  | 1.02147  | 1.56615  |

|   |          |          |          |
|---|----------|----------|----------|
| H | -0.4113  | -0.66136 | 1.30251  |
| C | -0.1031  | 2.73104  | 3.08752  |
| C | 0.89347  | 1.57377  | 2.91891  |
| H | 0.29963  | 3.62425  | 2.60075  |
| H | 1.92091  | 1.91683  | 3.05451  |
| H | 1.75423  | 1.10304  | 0.8423   |
| H | -1.52968 | 0.36938  | 3.12451  |
| H | -0.74888 | 0.66996  | 0.19009  |
| H | 0.72032  | 0.7622   | 3.6389   |
| H | -0.16814 | 2.96203  | 4.15651  |
| H | -2.25399 | 2.59762  | 3.32474  |
| C | -1.93507 | 3.34984  | 1.37582  |
| C | -3.18569 | 3.98527  | 1.40534  |
| C | -1.09944 | 3.59621  | 0.27385  |
| C | -3.60388 | 4.83024  | 0.37609  |
| H | -3.847   | 3.82498  | 2.25388  |
| C | -1.49889 | 4.43731  | -0.76437 |
| H | -0.1192  | 3.1331   | 0.21766  |
| C | -2.74895 | 5.0416   | -0.69811 |
| H | -4.56889 | 5.32577  | 0.40201  |
| H | -0.8524  | 4.62885  | -1.6144  |
| F | -3.13839 | 5.85915  | -1.69864 |

### Dehydration mechanisms

#### <sup>2</sup>TS-D<sub>m</sub>

|    |          |          |          |
|----|----------|----------|----------|
| Fe | 3.54821  | 0.45516  | 0.47453  |
| S  | 4.83333  | 1.50383  | 1.9654   |
| H  | 4.73036  | 0.59722  | 2.96464  |
| N  | 4.82284  | 0.71212  | -1.05502 |
| C  | 6.67073  | 0.49245  | -2.43289 |
| C  | 6.03639  | 1.63973  | -2.79595 |
| H  | 7.56657  | 0.05375  | -2.85381 |
| H  | 6.30179  | 2.34146  | -3.57621 |
| N  | 2.59218  | 2.12529  | -0.09239 |
| C  | 2.94524  | 3.00714  | -1.08802 |
| C  | 2.06239  | 4.1467   | -1.09085 |
| C  | 1.17569  | 3.95665  | -0.07693 |
| H  | 2.12907  | 4.97458  | -1.78512 |
| H  | 0.35936  | 4.59567  | 0.23528  |
| N  | 2.07099  | 0.03426  | 1.76521  |
| C  | 1.06001  | 0.88813  | 2.14747  |
| C  | 1.93741  | -1.07877 | 2.56799  |
| C  | 0.27241  | 0.29548  | 3.19842  |
| C  | 0.81322  | -0.92759 | 3.45536  |
| H  | -0.58394 | 0.76603  | 3.66484  |
| H  | 0.49541  | -1.66846 | 4.17808  |
| N  | 4.31953  | -1.365   | 0.82248  |
| C  | 4.80273  | -3.42485 | 1.76486  |
| H  | 4.68808  | -4.29389 | 2.40036  |
| C  | 3.90083  | -2.3016  | 1.74197  |
| C  | 5.91005  | -0.0792  | -1.34951 |
| C  | 4.89447  | 1.77454  | -1.92786 |

|   |          |          |          |
|---|----------|----------|----------|
| C | 1.51027  | 2.69528  | 0.53759  |
| C | 2.78256  | -2.1782  | 2.55253  |
| H | 2.5667   | -2.98938 | 3.24123  |
| C | 6.22329  | -1.27737 | -0.72679 |
| H | 7.11247  | -1.79962 | -1.06637 |
| C | 4.01279  | 2.84335  | -1.9569  |
| H | 4.18184  | 3.61636  | -2.69989 |
| C | 0.80359  | 2.13126  | 1.58822  |
| H | -0.03273 | 2.69614  | 1.98861  |
| C | 5.78184  | -3.15928 | 0.85725  |
| H | 6.63714  | -3.76684 | 0.58973  |
| C | 5.4732   | -1.87762 | 0.27399  |
| C | -0.48724 | -1.26202 | -1.16427 |
| C | 0.16014  | -2.46597 | -0.98105 |
| C | -0.53113 | -3.6404  | -0.73801 |
| C | -1.92275 | -3.53618 | -0.69558 |
| C | -2.58359 | -2.30429 | -0.88437 |
| C | -1.86329 | -1.11973 | -1.12584 |
| C | 1.66756  | -0.9187  | -1.3651  |
| H | -0.02514 | -4.58786 | -0.59128 |
| H | -2.5351  | -4.41298 | -0.5152  |
| H | -2.33345 | -0.15746 | -1.27593 |
| H | 2.5566   | -0.51177 | -1.98623 |
| O | 0.48033  | -0.2907  | -1.35051 |
| O | 1.52764  | -2.21934 | -1.05691 |
| O | -3.9427  | -2.3609  | -0.81812 |
| C | -4.6922  | -1.15605 | -0.99552 |
| H | -4.38442 | -0.41145 | -0.25005 |
| H | -4.49426 | -0.74229 | -1.99522 |
| C | -6.16994 | -1.49971 | -0.84097 |
| C | -6.47066 | -2.05954 | 0.56692  |
| C | -7.0898  | -0.30533 | -1.22906 |
| N | -7.90165 | -1.94281 | 0.89343  |
| H | -6.11182 | -3.09984 | 0.6028   |
| C | -8.5853  | -0.75563 | -1.12625 |
| C | -8.76993 | -2.02747 | -0.28013 |
| H | -9.17253 | 0.05612  | -0.68618 |
| H | -9.80822 | -2.09586 | 0.06229  |
| H | -8.15837 | -2.64484 | 1.58191  |
| H | -6.38092 | -2.29244 | -1.57128 |
| H | -5.89677 | -1.49946 | 1.31807  |
| H | -8.58069 | -2.92794 | -0.895   |
| H | -8.98819 | -0.93228 | -2.13085 |
| H | -6.87978 | -0.09719 | -2.28581 |
| C | -6.777   | 0.9867   | -0.47827 |
| C | -6.11463 | 2.03044  | -1.14209 |
| C | -7.12656 | 1.18006  | 0.86957  |
| C | -5.7975  | 3.22708  | -0.49622 |
| H | -5.84567 | 1.91379  | -2.1898  |
| C | -6.81826 | 2.36889  | 1.53108  |
| H | -7.64898 | 0.38507  | 1.39542  |
| C | -6.15567 | 3.37541  | 0.83724  |

|                                     |          |          |          |
|-------------------------------------|----------|----------|----------|
| H                                   | -5.28986 | 4.03604  | -1.01155 |
| H                                   | -7.08666 | 2.52439  | 2.57132  |
| F                                   | -5.85677 | 4.52829  | 1.47494  |
| O                                   | 2.2305   | -0.83376 | -3.32624 |
| H                                   | 2.6947   | -1.6869  | -3.42107 |
| <b><sup>4</sup>TS-D<sub>m</sub></b> |          |          |          |
| Fe                                  | 3.83028  | 0.53887  | 0.4806   |
| S                                   | 5.45476  | 1.65904  | 1.67843  |
| H                                   | 5.44221  | 0.88162  | 2.78585  |
| N                                   | 5.00198  | -0.84124 | -0.57217 |
| C                                   | 6.39598  | -2.61761 | -1.02483 |
| C                                   | 6.55129  | -1.71328 | -2.03517 |
| H                                   | 6.8909   | -3.57286 | -0.90173 |
| H                                   | 7.19697  | -1.78369 | -2.90149 |
| N                                   | 3.89114  | 1.77539  | -1.15557 |
| C                                   | 4.75592  | 1.67252  | -2.21802 |
| C                                   | 4.63785  | 2.84717  | -3.05461 |
| C                                   | 3.69025  | 3.64489  | -2.48898 |
| H                                   | 5.19836  | 3.01564  | -3.96535 |
| H                                   | 3.31977  | 4.59858  | -2.84314 |
| N                                   | 2.12477  | 1.56987  | 1.13771  |
| C                                   | 1.67544  | 2.76945  | 0.65405  |
| C                                   | 1.42157  | 1.31456  | 2.28578  |
| C                                   | 0.62465  | 3.27754  | 1.50809  |
| C                                   | 0.46707  | 2.37558  | 2.51967  |
| H                                   | 0.09049  | 4.20652  | 1.35253  |
| H                                   | -0.22084 | 2.42158  | 3.35468  |
| N                                   | 3.42431  | -0.91954 | 1.86252  |
| C                                   | 2.71836  | -1.96407 | 3.79111  |
| H                                   | 2.15536  | -2.13628 | 4.69993  |
| C                                   | 2.56372  | -0.8129  | 2.93037  |
| C                                   | 5.4312   | -2.05631 | -0.10576 |
| C                                   | 5.68228  | -0.59732 | -1.73577 |
| C                                   | 3.21958  | 2.96497  | -1.30129 |
| C                                   | 1.63576  | 0.21362  | 3.11829  |
| H                                   | 1.01266  | 0.14504  | 4.00585  |
| C                                   | 5.01953  | -2.6327  | 1.0982   |
| H                                   | 5.45475  | -3.59563 | 1.35116  |
| C                                   | 5.57378  | 0.57506  | -2.48819 |
| H                                   | 6.1823   | 0.6354   | -3.38599 |
| C                                   | 2.19364  | 3.41715  | -0.47055 |
| H                                   | 1.7472   | 4.37297  | -0.73031 |
| C                                   | 3.66697  | -2.76246 | 3.22374  |
| H                                   | 4.03515  | -3.71769 | 3.57669  |
| C                                   | 4.10183  | -2.10772 | 2.01039  |
| C                                   | -0.72791 | -1.35321 | -1.04136 |
| C                                   | -0.07859 | -2.52943 | -0.73035 |
| C                                   | -0.76816 | -3.67289 | -0.3647  |
| C                                   | -2.16004 | -3.56781 | -0.33591 |
| C                                   | -2.82301 | -2.36428 | -0.65505 |
| C                                   | -2.10449 | -1.21019 | -1.01907 |

|                                    |           |          |          |
|------------------------------------|-----------|----------|----------|
| C                                  | 1.4296    | -1.0261  | -1.26798 |
| H                                  | -0.26065  | -4.59809 | -0.11638 |
| H                                  | -2.77097  | -4.42173 | -0.06405 |
| H                                  | -2.57631  | -0.26976 | -1.26924 |
| H                                  | 2.32145   | -0.68564 | -1.92329 |
| O                                  | 0.23982   | -0.40547 | -1.32617 |
| O                                  | 1.28828   | -2.28762 | -0.8269  |
| O                                  | -4.1822   | -2.41626 | -0.58472 |
| C                                  | -4.93196  | -1.23421 | -0.87721 |
| H                                  | -4.62305  | -0.42118 | -0.20756 |
| H                                  | -4.73521  | -0.91903 | -1.91241 |
| C                                  | -6.41     | -1.55935 | -0.68846 |
| C                                  | -6.70697  | -1.99241 | 0.764    |
| C                                  | -7.32631  | -0.39902 | -1.17696 |
| N                                  | -8.13554  | -1.83948 | 1.08574  |
| H                                  | -6.35351  | -3.02763 | 0.88857  |
| C                                  | -8.82373  | -0.82922 | -1.02698 |
| C                                  | -9.01104  | -2.02053 | -0.0718  |
| H                                  | -9.40302  | 0.02183  | -0.65612 |
| H                                  | -10.04767 | -2.05181 | 0.28094  |
| H                                  | -8.39248  | -2.47757 | 1.8338   |
| H                                  | -6.62619  | -2.4122  | -1.34594 |
| H                                  | -6.12561  | -1.3727  | 1.46059  |
| H                                  | -8.83153  | -2.97258 | -0.60672 |
| H                                  | -9.23426  | -1.09043 | -2.00984 |
| H                                  | -7.12046  | -0.28558 | -2.2488  |
| C                                  | -7.00445  | 0.9525   | -0.54352 |
| C                                  | -6.34908  | 1.9343   | -1.3019  |
| C                                  | -7.33901  | 1.26149  | 0.78647  |
| C                                  | -6.02336  | 3.18111  | -0.76433 |
| H                                  | -6.09268  | 1.72807  | -2.33891 |
| C                                  | -7.02138  | 2.50159  | 1.34051  |
| H                                  | -7.85778  | 0.51591  | 1.38351  |
| C                                  | -6.3653   | 3.44353  | 0.5558   |
| H                                  | -5.52075  | 3.94201  | -1.35262 |
| H                                  | -7.27774  | 2.74604  | 2.36659  |
| F                                  | -6.05742  | 4.64588  | 1.0892   |
| O                                  | 2.04595   | -1.1346  | -3.2347  |
| H                                  | 2.5063    | -1.99477 | -3.22827 |
| <b><sup>2</sup>P-C<sub>m</sub></b> |           |          |          |
| Fe                                 | -3.52761  | 0.38194  | 0.23658  |
| S                                  | -5.5153   | 1.27231  | 0.85074  |
| H                                  | -5.96533  | 1.64534  | -0.36921 |
| N                                  | -4.42533  | -0.87737 | -1.06105 |
| C                                  | -5.39513  | -1.79607 | -2.94376 |
| C                                  | -5.56632  | -2.68556 | -1.92786 |
| H                                  | -5.71993  | -1.87626 | -3.9736  |
| H                                  | -6.06022  | -3.64891 | -1.95125 |
| N                                  | -3.70736  | -0.97898 | 1.72926  |
| C                                  | -4.34477  | -2.18818 | 1.64145  |
| C                                  | -4.31574  | -2.85671 | 2.92309  |



|   |          |          |          |
|---|----------|----------|----------|
| C | -3.64889 | -2.03599 | 3.77989  |
| H | -4.75558 | -3.82585 | 3.12254  |
| H | -3.428   | -2.19054 | 4.82856  |
| N | -2.53239 | 1.59693  | 1.5042   |
| C | -2.25143 | 1.37247  | 2.82729  |
| C | -2.06435 | 2.85279  | 1.22001  |
| C | -1.57807 | 2.51782  | 3.39395  |
| C | -1.46388 | 3.43734  | 2.39747  |
| H | -1.25224 | 2.59376  | 4.42378  |
| H | -1.02337 | 4.42572  | 2.43778  |
| N | -3.29454 | 1.72013  | -1.26608 |
| C | -2.75655 | 3.63295  | -2.44036 |
| H | -2.36637 | 4.6257   | -2.62689 |
| C | -2.70991 | 2.95627  | -1.16406 |
| C | -4.68594 | -0.66592 | -2.38985 |
| C | -4.95756 | -2.10268 | -0.75399 |
| C | -3.2732  | -0.86352 | 3.02358  |
| C | -2.138   | 3.48806  | -0.01351 |
| H | -1.71579 | 4.48596  | -0.08431 |
| C | -4.34658 | 0.47927  | -3.10422 |
| H | -4.62568 | 0.51702  | -4.15305 |
| C | -4.92447 | -2.71537 | 0.49318  |
| H | -5.3949  | -3.69036 | 0.57803  |
| C | -2.5807  | 0.22549  | 3.53995  |
| H | -2.29676 | 0.18843  | 4.58727  |
| C | -3.37802 | 2.78905  | -3.31157 |
| H | -3.60013 | 2.94566  | -4.35976 |
| C | -3.71129 | 1.59655  | -2.56727 |
| C | 0.39456  | -1.04337 | -0.15922 |
| C | -0.29313 | -2.11213 | -0.68303 |
| C | 0.34653  | -3.27178 | -1.09349 |
| C | 1.73035  | -3.28475 | -0.93835 |
| C | 2.43673  | -2.18494 | -0.3963  |
| C | 1.76919  | -1.0176  | 0.01149  |
| C | -1.75738 | -0.53573 | -0.18298 |
| H | -0.19212 | -4.11537 | -1.50942 |
| H | 2.30937  | -4.1531  | -1.2334  |
| H | 2.2737   | -0.15534 | 0.42585  |
| O | -0.54847 | -0.07841 | 0.15278  |
| O | -1.63657 | -1.7637  | -0.67767 |
| O | 3.78161  | -2.35895 | -0.30121 |
| C | 4.57533  | -1.30476 | 0.25323  |
| H | 4.45652  | -0.39437 | -0.34808 |
| H | 4.23456  | -1.08847 | 1.27621  |
| C | 6.02803  | -1.76811 | 0.26056  |
| C | 6.5362   | -2.04698 | -1.17071 |
| C | 6.94559  | -0.78971 | 1.05102  |
| N | 8.00696  | -2.02148 | -1.22784 |
| H | 6.11607  | -3.01028 | -1.49931 |
| C | 8.39764  | -1.37227 | 1.09304  |
| C | 8.64293  | -2.4462  | 0.01846  |
| H | 9.11264  | -0.55572 | 0.95421  |

|                                    |          |          |          |
|------------------------------------|----------|----------|----------|
| H                                  | 9.71851  | -2.55031 | -0.1609  |
| H                                  | 8.33382  | -2.58361 | -2.00873 |
| H                                  | 6.0471   | -2.71537 | 0.8161   |
| H                                  | 6.14867  | -1.28091 | -1.85634 |
| H                                  | 8.28664  | -3.43202 | 0.37386  |
| H                                  | 8.59474  | -1.80394 | 2.08177  |
| H                                  | 6.56139  | -0.78325 | 2.07891  |
| C                                  | 6.87163  | 0.65722  | 0.56839  |
| C                                  | 6.17732  | 1.60698  | 1.33304  |
| C                                  | 7.47649  | 1.08667  | -0.62574 |
| C                                  | 6.07427  | 2.94003  | 0.93058  |
| H                                  | 5.71291  | 1.30489  | 2.2694   |
| C                                  | 7.38422  | 2.41432  | -1.04348 |
| H                                  | 8.02441  | 0.3641   | -1.22505 |
| C                                  | 6.68217  | 3.32211  | -0.25818 |
| H                                  | 5.54205  | 3.67593  | 1.52458  |
| H                                  | 7.84935  | 2.7521   | -1.96425 |
| F                                  | 6.59299  | 4.60877  | -0.65884 |
| O                                  | -0.84201 | 0.16179  | -2.89577 |
| H                                  | -0.8702  | 1.10774  | -2.68383 |
| H                                  | -1.76508 | -0.02759 | -3.12967 |
| <b><sup>4</sup>P-C<sub>m</sub></b> |          |          |          |
| Fe                                 | -3.55767 | 0.39831  | 0.2193   |
| S                                  | -5.55616 | 1.33912  | 0.79761  |
| H                                  | -5.67221 | 2.2001   | -0.23876 |
| N                                  | -4.46901 | -1.11517 | -0.93922 |
| C                                  | -5.53726 | -2.2109  | -2.64844 |
| C                                  | -5.65263 | -2.98791 | -1.53241 |
| H                                  | -5.92528 | -2.40715 | -3.64047 |
| H                                  | -6.15257 | -3.94383 | -1.43523 |
| N                                  | -3.69988 | -0.78553 | 1.88178  |
| C                                  | -4.31307 | -2.0084  | 1.94817  |
| C                                  | -4.24949 | -2.48973 | 3.31354  |
| C                                  | -3.59219 | -1.54367 | 4.04307  |
| H                                  | -4.65917 | -3.43184 | 3.65616  |
| H                                  | -3.35801 | -1.55927 | 5.1003   |
| N                                  | -2.44619 | 1.81893  | 1.32116  |
| C                                  | -2.18565 | 1.75769  | 2.65716  |
| C                                  | -2.00343 | 3.02198  | 0.85992  |
| C                                  | -1.51553 | 2.97787  | 3.06762  |
| C                                  | -1.40221 | 3.76039  | 1.95519  |
| H                                  | -1.19105 | 3.20265  | 4.0763   |
| H                                  | -0.96774 | 4.74952  | 1.87737  |
| N                                  | -3.38505 | 1.56975  | -1.45326 |
| C                                  | -2.88004 | 3.29972  | -2.87335 |
| H                                  | -2.49258 | 4.25294  | -3.21137 |
| C                                  | -2.7787  | 2.79877  | -1.51772 |
| C                                  | -4.79935 | -1.02366 | -2.25803 |
| C                                  | -4.98377 | -2.28095 | -0.45592 |
| C                                  | -3.24432 | -0.46943 | 3.13475  |
| C                                  | -2.14377 | 3.46543  | -0.46003 |

|   |          |          |          |
|---|----------|----------|----------|
| H | -1.73051 | 4.44334  | -0.69192 |
| C | -4.49629 | 0.07084  | -3.07831 |
| H | -4.8144  | 0.00511  | -4.1154  |
| C | -4.89718 | -2.69781 | 0.87746  |
| H | -5.34872 | -3.65673 | 1.11679  |
| C | -2.54322 | 0.69029  | 3.48998  |
| H | -2.26456 | 0.77689  | 4.53669  |
| C | -3.54336 | 2.35529  | -3.60345 |
| H | -3.80017 | 2.38453  | -4.65517 |
| C | -3.85484 | 1.26272  | -2.70471 |
| C | 0.42521  | -1.06973 | -0.1077  |
| C | -0.25946 | -2.15263 | -0.60559 |
| C | 0.382    | -3.32274 | -0.98274 |
| C | 1.76495  | -3.33019 | -0.8226  |
| C | 2.4689   | -2.21521 | -0.30816 |
| C | 1.7994   | -1.03838 | 0.06747  |
| C | -1.72561 | -0.56249 | -0.16071 |
| H | -0.15488 | -4.17736 | -1.37789 |
| H | 2.34597  | -4.20524 | -1.09292 |
| H | 2.30213  | -0.16493 | 0.46     |
| O | -0.52062 | -0.09672 | 0.17164  |
| O | -1.60318 | -1.80442 | -0.61537 |
| O | 3.81351  | -2.38555 | -0.20743 |
| C | 4.60856  | -1.31383 | 0.31075  |
| H | 4.48137  | -0.4209  | -0.31451 |
| H | 4.27624  | -1.07045 | 1.3304   |
| C | 6.0625   | -1.77354 | 0.31651  |
| C | 6.55705  | -2.0882  | -1.11232 |
| C | 6.98558  | -0.7741  | 1.07343  |
| N | 8.02701  | -2.06038 | -1.1851  |
| H | 6.13624  | -3.0608  | -1.41123 |
| C | 8.43951  | -1.35229 | 1.11463  |
| C | 8.67611  | -2.45264 | 0.06514  |
| H | 9.15077  | -0.53779 | 0.94722  |
| H | 9.75004  | -2.55964 | -0.12216 |
| H | 8.3474   | -2.64126 | -1.95489 |
| H | 6.0887   | -2.70638 | 0.89571  |
| H | 6.16047  | -1.3412  | -1.81369 |
| H | 8.32476  | -3.42965 | 0.44856  |
| H | 8.64842  | -1.75813 | 2.11185  |
| H | 6.61169  | -0.74339 | 2.10467  |
| C | 6.90343  | 0.66032  | 0.55632  |
| C | 6.21926  | 1.62865  | 1.3066   |
| C | 7.49105  | 1.05967  | -0.6567  |
| C | 6.1096   | 2.95109  | 0.87205  |
| H | 5.76855  | 1.35012  | 2.25684  |
| C | 7.39181  | 2.37622  | -1.1066  |
| H | 8.03135  | 0.32223  | -1.24469 |
| C | 6.70021  | 3.3032   | -0.33456 |
| H | 5.58522  | 3.70153  | 1.45472  |
| H | 7.84356  | 2.69086  | -2.0421  |
| F | 6.6044   | 4.57931  | -0.76624 |

|                                     |          |          |          |
|-------------------------------------|----------|----------|----------|
| O                                   | -0.83933 | 0.06321  | -2.88767 |
| H                                   | -0.90643 | 1.01547  | -2.71557 |
| H                                   | -1.75019 | -0.1707  | -3.12834 |
| <b><sup>2</sup>TS-D<sub>N</sub></b> |          |          |          |
| Fe                                  | 2.87151  | -0.60095 | 0.25833  |
| S                                   | 4.52689  | -1.93401 | 0.97808  |
| H                                   | 4.34081  | -2.95312 | 0.10859  |
| N                                   | 3.42937  | -0.80827 | -1.6669  |
| C                                   | 3.73061  | -1.62658 | -3.80824 |
| C                                   | 4.59864  | -0.58948 | -3.65015 |
| H                                   | 3.5809   | -2.25375 | -4.67782 |
| H                                   | 5.30697  | -0.18842 | -4.36396 |
| N                                   | 4.07199  | 1.00792  | 0.45885  |
| C                                   | 4.96311  | 1.47365  | -0.47651 |
| C                                   | 5.72928  | 2.57078  | 0.06597  |
| C                                   | 5.3013   | 2.75546  | 1.34461  |
| H                                   | 6.49442  | 3.11396  | -0.47411 |
| H                                   | 5.64176  | 3.48093  | 2.07254  |
| N                                   | 2.20967  | -0.30049 | 2.13856  |
| C                                   | 2.63285  | 0.64821  | 3.03836  |
| C                                   | 1.32118  | -1.09666 | 2.81858  |
| C                                   | 1.96921  | 0.46538  | 4.30685  |
| C                                   | 1.1565   | -0.61779 | 4.17124  |
| H                                   | 2.12672  | 1.08608  | 5.17984  |
| H                                   | 0.50677  | -1.07036 | 4.90972  |
| N                                   | 1.61478  | -2.15484 | 0.03154  |
| C                                   | 0.11935  | -3.85538 | 0.4947   |
| H                                   | -0.57294 | -4.46025 | 1.06632  |
| C                                   | 0.82037  | -2.70267 | 1.00889  |
| C                                   | 3.0148   | -1.76436 | -2.56419 |
| C                                   | 4.41202  | -0.08875 | -2.30936 |
| C                                   | 4.27394  | 1.77079  | 1.58412  |
| C                                   | 0.67224  | -2.21015 | 2.29945  |
| H                                   | -0.002   | -2.74568 | 2.96089  |
| C                                   | 2.075    | -2.75269 | -2.30293 |
| H                                   | 1.8415   | -3.44775 | -3.10349 |
| C                                   | 5.11916  | 0.97545  | -1.76346 |
| H                                   | 5.86386  | 1.45151  | -2.39398 |
| C                                   | 3.5909   | 1.62093  | 2.7853   |
| H                                   | 3.84426  | 2.29891  | 3.59457  |
| C                                   | 0.50042  | -4.00081 | -0.8043  |
| H                                   | 0.19176  | -4.75372 | -1.51852 |
| C                                   | 1.43715  | -2.93897 | -1.08394 |
| O                                   | 1.31836  | 1.3761   | -2.21717 |
| C                                   | -1.37872 | 1.12289  | -1.02417 |
| C                                   | -0.2708  | 0.27245  | -0.35883 |
| C                                   | -1.20182 | 2.66576  | -0.76805 |
| N                                   | 1.06636  | 0.84239  | -0.29176 |
| H                                   | -0.52066 | 0.09545  | 0.70187  |
| C                                   | -0.17383 | 2.89993  | 0.35847  |
| C                                   | 1.12764  | 2.18519  | 0.03642  |

|                                     |          |          |          |
|-------------------------------------|----------|----------|----------|
| H                                   | 0.01894  | 3.97217  | 0.47241  |
| H                                   | 1.43848  | 2.34241  | -1.20717 |
| H                                   | 2.20835  | 1.02918  | -2.41868 |
| H                                   | -0.21378 | -0.70284 | -0.833   |
| H                                   | -0.56573 | 2.54586  | 1.32484  |
| H                                   | -1.28188 | 0.95525  | -2.10104 |
| H                                   | -0.73501 | 3.0556   | -1.67883 |
| H                                   | 2.00692  | 2.43908  | 0.62543  |
| C                                   | -2.49667 | 3.44735  | -0.58313 |
| C                                   | -3.09497 | 4.06342  | -1.69367 |
| C                                   | -3.12888 | 3.59025  | 0.66235  |
| C                                   | -4.28177 | 4.78759  | -1.58032 |
| H                                   | -2.61994 | 3.97862  | -2.66826 |
| C                                   | -4.31593 | 4.3118   | 0.79873  |
| H                                   | -2.69243 | 3.14017  | 1.54926  |
| C                                   | -4.87614 | 4.89946  | -0.32909 |
| H                                   | -4.74171 | 5.26576  | -2.43901 |
| H                                   | -4.80387 | 4.4259   | 1.76132  |
| F                                   | -6.0222  | 5.6013   | -0.20449 |
| C                                   | -2.74515 | 0.57798  | -0.59956 |
| H                                   | -2.92469 | 0.73895  | 0.47418  |
| H                                   | -3.54591 | 1.08453  | -1.15192 |
| O                                   | -2.75629 | -0.81734 | -0.88554 |
| C                                   | -3.87119 | -1.54739 | -0.57077 |
| C                                   | -5.0573  | -0.97566 | -0.0646  |
| C                                   | -3.76835 | -2.92823 | -0.78721 |
| C                                   | -6.09668 | -1.85166 | 0.19732  |
| H                                   | -5.17053 | 0.08617  | 0.1113   |
| C                                   | -4.84203 | -3.78858 | -0.51477 |
| H                                   | -2.82837 | -3.31647 | -1.1643  |
| C                                   | -6.00068 | -3.21985 | -0.01947 |
| H                                   | -4.76625 | -4.85681 | -0.68723 |
| O                                   | -7.35167 | -1.5424  | 0.66554  |
| O                                   | -7.2006  | -3.8262  | 0.29838  |
| C                                   | -7.9849  | -2.80448 | 0.91558  |
| H                                   | -8.98744 | -2.79847 | 0.4785   |
| H                                   | -8.03204 | -2.97734 | 2.00116  |
| <b><sup>4</sup>TS-D<sub>N</sub></b> |          |          |          |
| Fe                                  | 3.19414  | -0.63365 | 0.1804   |
| S                                   | 5.14812  | -2.05677 | 0.4872   |
| H                                   | 5.1342   | -2.0182  | 1.83913  |
| N                                   | 3.68742  | -0.20126 | -1.72458 |
| C                                   | 4.06769  | -0.41138 | -3.99347 |
| C                                   | 4.80774  | 0.64813  | -3.55908 |
| H                                   | 3.98644  | -0.80926 | -4.99686 |
| H                                   | 5.45652  | 1.29699  | -4.13335 |
| N                                   | 4.08331  | 1.07878  | 0.78004  |
| C                                   | 4.88235  | 1.9001   | 0.01881  |
| C                                   | 5.45699  | 2.9373   | 0.83811  |
| C                                   | 5.00685  | 2.7319   | 2.10648  |
| H                                   | 6.11959  | 3.71234  | 0.47459  |

|   |          |          |          |
|---|----------|----------|----------|
| H | 5.22423  | 3.30271  | 3.00034  |
| N | 2.43877  | -0.86765 | 2.02909  |
| C | 2.73586  | -0.12247 | 3.14792  |
| C | 1.60634  | -1.87672 | 2.45845  |
| C | 2.08552  | -0.68106 | 4.30439  |
| C | 1.38624  | -1.77019 | 3.87703  |
| H | 2.16101  | -0.27952 | 5.30698  |
| H | 0.76891  | -2.44501 | 4.45627  |
| N | 1.96656  | -2.09098 | -0.4902  |
| C | 0.57264  | -3.93467 | -0.55441 |
| H | -0.08588 | -4.71278 | -0.19008 |
| C | 1.19501  | -2.93309 | 0.27546  |
| C | 3.37625  | -0.93771 | -2.84741 |
| C | 4.56833  | 0.77407  | -2.1463  |
| C | 4.15933  | 1.56647  | 2.06391  |
| C | 1.02783  | -2.84472 | 1.64903  |
| H | 0.38874  | -3.58096 | 2.12596  |
| C | 2.51545  | -2.02534 | -2.88239 |
| H | 2.35017  | -2.50333 | -3.84259 |
| C | 5.12115  | 1.75921  | -1.34031 |
| H | 5.78888  | 2.47443  | -1.80988 |
| C | 3.53463  | 1.01257  | 3.17206  |
| H | 3.68474  | 1.50026  | 4.1301   |
| C | 0.98263  | -3.69697 | -1.83065 |
| H | 0.73173  | -4.24019 | -2.73277 |
| C | 1.85895  | -2.55273 | -1.78053 |
| O | 1.08009  | 1.73769  | -1.91314 |
| C | -1.66964 | 1.2167   | -0.84186 |
| C | -0.50818 | 0.38971  | -0.23639 |
| C | -1.57096 | 2.74576  | -0.479   |
| N | 0.77588  | 1.0403   | -0.07156 |
| H | -0.76385 | 0.09951  | 0.79932  |
| C | -0.60885 | 2.95705  | 0.71085  |
| C | 0.74349  | 2.33951  | 0.3916   |
| H | -0.49107 | 4.0282   | 0.90886  |
| H | 1.10075  | 2.61042  | -0.83428 |
| H | 2.00126  | 1.4423   | -2.04547 |
| H | -0.36684 | -0.53472 | -0.79366 |
| H | -1.02305 | 2.5119   | 1.62974  |
| H | -1.57204 | 1.13114  | -1.92863 |
| H | -1.07925 | 3.21053  | -1.34015 |
| H | 1.58788  | 2.57581  | 1.04344  |
| C | -2.91042 | 3.45394  | -0.31825 |
| C | -3.50003 | 4.07363  | -1.43163 |
| C | -3.59494 | 3.5221   | 0.90542  |
| C | -4.72768 | 4.72954  | -1.34192 |
| H | -2.98524 | 4.04581  | -2.3892  |
| C | -4.82339 | 4.17554  | 1.01834  |
| H | -3.16721 | 3.06736  | 1.79412  |
| C | -5.37273 | 4.76927  | -0.11147 |
| H | -5.18093 | 5.21071  | -2.20252 |
| H | -5.35157 | 4.23263  | 1.96465  |

|                                    |          |          |          |
|------------------------------------|----------|----------|----------|
| F                                  | -6.55887 | 5.40558  | -0.00972 |
| C                                  | -3.00223 | 0.57256  | -0.45197 |
| H                                  | -3.18684 | 0.66071  | 0.62961  |
| H                                  | -3.83393 | 1.06065  | -0.97409 |
| O                                  | -2.93171 | -0.80296 | -0.81767 |
| C                                  | -4.00122 | -1.61425 | -0.54977 |
| C                                  | -5.21167 | -1.14737 | 0.00418  |
| C                                  | -3.8247  | -2.96855 | -0.86461 |
| C                                  | -6.19742 | -2.09672 | 0.21175  |
| H                                  | -5.38179 | -0.10836 | 0.25469  |
| C                                  | -4.84526 | -3.90526 | -0.64462 |
| H                                  | -2.87125 | -3.2751  | -1.28171 |
| C                                  | -6.02764 | -3.43893 | -0.10079 |
| H                                  | -4.71261 | -4.95265 | -0.89354 |
| O                                  | -7.46186 | -1.89176 | 0.71016  |
| O                                  | -7.18757 | -4.13308 | 0.1837   |
| C                                  | -8.02518 | -3.20098 | 0.86931  |
| H                                  | -9.02733 | -3.21855 | 0.4313   |
| H                                  | -8.06176 | -3.45204 | 1.93981  |
| <b><sup>2</sup>P-C<sub>N</sub></b> |          |          |          |
| Fe                                 | -2.56324 | -0.70379 | 0.5556   |
| S                                  | -4.02627 | -1.59417 | 2.01636  |
| H                                  | -4.26993 | -2.75353 | 1.3633   |
| N                                  | -1.54313 | -2.43339 | 0.40062  |
| C                                  | -0.82447 | -4.52601 | -0.25768 |
| C                                  | -0.1282  | -4.19556 | 0.86913  |
| H                                  | -0.76357 | -5.43312 | -0.84583 |
| H                                  | 0.62151  | -4.77665 | 1.39151  |
| N                                  | -1.3806  | -0.11591 | 2.08235  |
| C                                  | -0.45283 | -0.89369 | 2.72947  |
| C                                  | 0.13435  | -0.15725 | 3.82544  |
| C                                  | -0.44752 | 1.07318  | 3.82888  |
| H                                  | 0.89389  | -0.54576 | 4.49214  |
| H                                  | -0.26963 | 1.90151  | 4.50306  |
| N                                  | -3.51528 | 1.07407  | 0.64335  |
| C                                  | -3.25676 | 2.12048  | 1.49221  |
| C                                  | -4.62873 | 1.43078  | -0.07509 |
| C                                  | -4.21872 | 3.17907  | 1.28613  |
| C                                  | -5.07532 | 2.74722  | 0.32105  |
| H                                  | -4.2328  | 4.11482  | 1.83076  |
| H                                  | -5.93467 | 3.2578   | -0.09518 |
| N                                  | -3.69048 | -1.25005 | -1.02131 |
| C                                  | -5.37693 | -1.31692 | -2.59852 |
| H                                  | -6.25048 | -1.0001  | -3.15442 |
| C                                  | -4.78249 | -0.57639 | -1.50951 |
| C                                  | -1.71396 | -3.42279 | -0.534   |
| C                                  | -0.58559 | -2.88678 | 1.27386  |
| C                                  | -1.40316 | 1.08389  | 2.74527  |
| C                                  | -5.22981 | 0.66453  | -1.06704 |
| H                                  | -6.10786 | 1.07898  | -1.55313 |
| C                                  | -2.64558 | -3.40148 | -1.56609 |

|   |          |          |          |
|---|----------|----------|----------|
| H | -2.67336 | -4.25704 | -2.23373 |
| C | -0.08602 | -2.183   | 2.36538  |
| H | 0.67242  | -2.6738  | 2.96766  |
| C | -2.25321 | 2.1455   | 2.45381  |
| H | -2.1684  | 3.03769  | 3.067    |
| C | -4.62809 | -2.44154 | -2.76517 |
| H | -4.76221 | -3.24131 | -3.48259 |
| C | -3.58454 | -2.39819 | -1.76788 |
| C | 6.56967  | -0.45116 | 0.17408  |
| C | 6.94987  | -1.78735 | 0.20915  |
| C | 6.06816  | -2.79548 | -0.1319  |
| C | 4.77069  | -2.41696 | -0.50931 |
| C | 4.39414  | -1.06956 | -0.5321  |
| C | 5.29892  | -0.04437 | -0.19256 |
| C | 8.65316  | -0.56082 | 0.96896  |
| H | 6.3683   | -3.83753 | -0.12099 |
| H | 4.04129  | -3.16173 | -0.81075 |
| H | 5.03428  | 1.00496  | -0.20588 |
| H | 8.72778  | -0.50809 | 2.06507  |
| H | 9.60414  | -0.29534 | 0.49919  |
| O | 7.6342   | 0.34452  | 0.52108  |
| O | 8.2773   | -1.88124 | 0.57407  |
| O | 3.08424  | -0.82288 | -0.88728 |
| C | 2.70221  | 0.50123  | -1.26439 |
| H | 2.82653  | 1.18507  | -0.41519 |
| H | 3.34998  | 0.84999  | -2.08168 |
| C | 1.24097  | 0.45856  | -1.71033 |
| C | 0.31493  | 0.13456  | -0.53049 |
| C | 0.81096  | 1.76336  | -2.43475 |
| N | -1.11989 | 0.20949  | -0.83272 |
| H | 0.51359  | -0.87584 | -0.17104 |
| C | -0.66013 | 1.58259  | -2.86254 |
| C | -1.51645 | 0.8498   | -1.86324 |
| H | -1.13107 | 2.55062  | -3.07589 |
| H | -2.58972 | 0.86443  | -2.04462 |
| H | 1.14756  | -0.35797 | -2.43956 |
| H | 0.50517  | 0.80861  | 0.31347  |
| H | -0.71013 | 1.01496  | -3.80387 |
| H | 1.41356  | 1.83833  | -3.34836 |
| C | 1.06628  | 3.03905  | -1.63897 |
| C | 2.17593  | 3.83746  | -1.95847 |
| C | 0.23731  | 3.46081  | -0.58546 |
| C | 2.46682  | 5.00658  | -1.25496 |
| H | 2.82562  | 3.54484  | -2.78017 |
| C | 0.51104  | 4.62752  | 0.12914  |
| H | -0.64096 | 2.88601  | -0.3077  |
| C | 1.6253   | 5.38293  | -0.2154  |
| H | 3.32296  | 5.62433  | -1.50559 |
| H | -0.12923 | 4.95178  | 0.94281  |
| F | 1.89286  | 6.51267  | 0.47159  |
| O | 1.67153  | -3.09062 | -2.06723 |
| H | 1.11628  | -3.44259 | -1.35262 |



|                               |          |          |          |
|-------------------------------|----------|----------|----------|
| H                             | 2.13193  | -2.33363 | -1.66676 |
| <sup>4</sup> P-C <sub>N</sub> |          |          |          |
| Fe                            | -2.57478 | -0.73076 | 0.54405  |
| S                             | -4.03963 | -1.69997 | 2.04676  |
| H                             | -4.97483 | -2.10174 | 1.15668  |
| N                             | -1.46867 | -2.5148  | 0.28629  |
| C                             | -0.84824 | -4.61168 | -0.40823 |
| C                             | -0.09287 | -4.30638 | 0.69161  |
| H                             | -0.83082 | -5.52156 | -0.99539 |
| H                             | 0.65664  | -4.92092 | 1.17509  |
| N                             | -1.38525 | -0.23169 | 2.11476  |
| C                             | -0.43763 | -1.03455 | 2.70134  |
| C                             | 0.11388  | -0.34815 | 3.85103  |
| C                             | -0.51362 | 0.85882  | 3.93762  |
| H                             | 0.88492  | -0.74841 | 4.49742  |
| H                             | -0.35992 | 1.64035  | 4.67127  |
| N                             | -3.52818 | 1.15732  | 0.64978  |
| C                             | -3.29237 | 2.10996  | 1.59713  |
| C                             | -4.61797 | 1.54933  | -0.07152 |
| C                             | -4.25113 | 3.18847  | 1.44154  |
| C                             | -5.07439 | 2.83946  | 0.41059  |
| H                             | -4.29626 | 4.07828  | 2.05744  |
| H                             | -5.92109 | 3.38934  | 0.01843  |
| N                             | -3.74397 | -1.21022 | -1.04759 |
| C                             | -5.41461 | -1.20747 | -2.62496 |
| H                             | -6.26814 | -0.86183 | -3.19484 |
| C                             | -4.80089 | -0.4789  | -1.53473 |
| C                             | -1.72501 | -3.47998 | -0.64091 |
| C                             | -0.50639 | -2.98734 | 1.13031  |
| C                             | -1.46379 | 0.92623  | 2.84613  |
| C                             | -5.20237 | 0.78828  | -1.09046 |
| H                             | -6.06482 | 1.21984  | -1.59098 |
| C                             | -2.72961 | -3.39714 | -1.6125  |
| H                             | -2.82075 | -4.24081 | -2.29084 |
| C                             | -0.02824 | -2.29424 | 2.24934  |
| H                             | 0.74156  | -2.7868  | 2.83678  |
| C                             | -2.3178  | 2.00848  | 2.59678  |
| H                             | -2.24354 | 2.84212  | 3.28985  |
| C                             | -4.71316 | -2.36639 | -2.77983 |
| H                             | -4.88081 | -3.1572  | -3.50036 |
| C                             | -3.66329 | -2.36892 | -1.78283 |
| C                             | 6.60356  | -0.41909 | 0.20417  |
| C                             | 6.98719  | -1.75474 | 0.21406  |
| C                             | 6.10792  | -2.75861 | -0.14532 |
| C                             | 4.80933  | -2.37649 | -0.5154  |
| C                             | 4.42919  | -1.02991 | -0.51265 |
| C                             | 5.33154  | -0.00898 | -0.15404 |
| C                             | 8.68745  | -0.53837 | 0.99638  |
| H                             | 6.41091  | -3.79986 | -0.15432 |
| H                             | 4.08235  | -3.11727 | -0.83211 |
| H                             | 5.06343  | 1.03955  | -0.14696 |

|   |          |          |          |
|---|----------|----------|----------|
| H | 8.76152  | -0.50633 | 2.09336  |
| H | 9.63797  | -0.26156 | 0.53222  |
| O | 7.66643  | 0.37271  | 0.56537  |
| O | 8.31524  | -1.85194 | 0.57623  |
| O | 3.1186   | -0.77908 | -0.86148 |
| C | 2.74035  | 0.54648  | -1.23915 |
| H | 2.85653  | 1.22867  | -0.38736 |
| H | 3.3961   | 0.89657  | -2.04946 |
| C | 1.28393  | 0.50162  | -1.69917 |
| C | 0.34433  | 0.17838  | -0.53029 |
| C | 0.85337  | 1.80222  | -2.43119 |
| N | -1.08381 | 0.23183  | -0.859   |
| H | 0.54803  | -0.8254  | -0.15548 |
| C | -0.60857 | 1.60552  | -2.88438 |
| C | -1.47169 | 0.86091  | -1.89897 |
| H | -1.08712 | 2.56837  | -3.10452 |
| H | -2.54243 | 0.8577   | -2.0985  |
| H | 1.20026  | -0.31742 | -2.42687 |
| H | 0.5117   | 0.86403  | 0.30999  |
| H | -0.63647 | 1.03852  | -3.82696 |
| H | 1.47087  | 1.8846   | -3.33417 |
| C | 1.07984  | 3.07978  | -1.62952 |
| C | 2.19736  | 3.88063  | -1.91345 |
| C | 0.21487  | 3.50168  | -0.60543 |
| C | 2.46126  | 5.052    | -1.20315 |
| H | 2.87485  | 3.58861  | -2.71259 |
| C | 0.46083  | 4.67093  | 0.11527  |
| H | -0.67064 | 2.92429  | -0.35752 |
| C | 1.58409  | 5.42848  | -0.19349 |
| H | 3.32356  | 5.67169  | -1.42639 |
| H | -0.20789 | 4.99584  | 0.90547  |
| F | 1.82525  | 6.5608   | 0.49911  |
| O | 1.72409  | -3.03893 | -2.10093 |
| H | 1.14919  | -3.42745 | -1.42162 |
| H | 2.16023  | -2.29259 | -1.65602 |
